# Supplementary material for: Hyperuricemia Increases the Risk of Atrial Fibrillation: A Systematic Review and Meta-Analysis
Source: Hindawi journal article supplement (doi:10.1155/2022/8172639), 2022-08-21

| Study or                        |        | HUA   | Common UA |       |        | Risk Ratio         |
|---------------------------------|--------|-------|-----------|-------|--------|--------------------|
| Subgroup                        | Events | Total | Events    | Total | Weight | MH, Random, 95% CI |
| RAAS.inhibitors = Less than 50% |        |       |           |       |        |                    |
| Gang Huang-2018                 | 26     | 342   | 29        | 696   | 30.6%  | 1.82 [1.09; 3.05]  |
| Filippo Valbusa et.al-2013      | 19     | 73    | 23        | 327   | 27.9%  | 3.70 [2.13; 6.43]  |
| Total (95% CI)                  |        | 415   |           | 1023  | 58.5%  | 2.58 [1.29; 5.16]  |

Heterogeneity:  $\text{Tau}^2 = 0.1760$ ;  $\text{Chi}^2 = 3.38$ ,  $\text{df} = 1$  ( $P = 0.07$ );  $I^2 = 70\%$

#### RAAS.inhibitors = More than 50%

|                        |    |            |    |             |               |                          |
|------------------------|----|------------|----|-------------|---------------|--------------------------|
| A Mantovani et.al-2016 | 48 | 233        | 43 | 609         | 41.5%         | 2.92 [1.99; 4.28]        |
| <b>Total (95% CI)</b>  |    | <b>648</b> |    | <b>1632</b> | <b>100.0%</b> | <b>2.70 [1.87; 3.90]</b> |

Heterogeneity:  $\text{Tau}^2 = 0.0468$ ;  $\text{Chi}^2 = 3.65$ ,  $\text{df} = 2$  ( $P = 0.16$ );  $I^2 = 45\%$

Test for subgroup differences:  $\text{Chi}^2 = 0.09$ ,  $\text{df} = 1$  ( $P = 0.76$ )

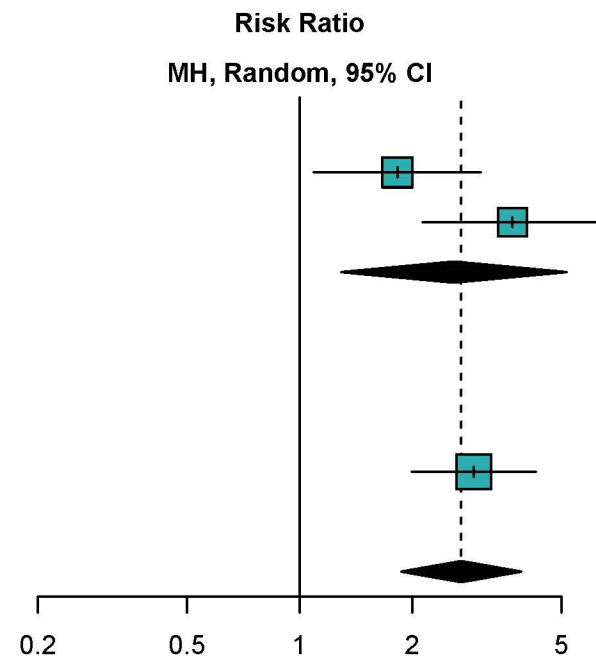

Supplement: f1 [file 8172639.f1.zip]
