# Supplementary material for: Hyperuricemia Increases the Risk of Atrial Fibrillation: A Systematic Review and Meta-Analysis
Source: Hindawi journal article supplement (doi:10.1155/2022/8172639), 2022-08-21
Supplement: f1 [file 8172639.f1.zip]

Mixed-Effects Model (k = 5; tau<sup>2</sup> estimator: REML)

tau<sup>2</sup> (estimated amount of residual heterogeneity): 0 (SE = 0.0232)  
tau (square root of estimated tau<sup>2</sup> value): 0  
I<sup>2</sup> (residual heterogeneity / unaccounted variability): 0.00%  
H<sup>2</sup> (unaccounted variability / sampling variability): 1.00  
R<sup>2</sup> (amount of heterogeneity accounted for): 100.00%

Test for Residual Heterogeneity:  
QE(df = 3) = 1.6346, p-val = 0.6516

Test of Moderators (coefficient 2):  
QM(df = 1) = 41.0069, p-val < .0001

Model Results:

|          | estimate | se     | zval   | pval   | ci.lb  | ci.ub  |     |
|----------|----------|--------|--------|--------|--------|--------|-----|
| intrcpt  | 0.4180   | 0.1167 | 3.5831 | 0.0003 | 0.1893 | 0.6466 | *** |
| Drinking | 2.0054   | 0.3132 | 6.4037 | <.0001 | 1.3916 | 2.6192 | *** |

---  
Signif. codes: 0 '\*\*\*' 0.001 '\*\*' 0.01 '\*' 0.05 '.' 0.1 ' ' 1
