# Supplementary material for: Hyperuricemia Increases the Risk of Atrial Fibrillation: A Systematic Review and Meta-Analysis
Source: Hindawi journal article supplement (doi:10.1155/2022/8172639), 2022-08-21
Supplement: f1 [file 8172639.f1.zip]

In this work, we synthesized the epidemiological evidence to determine the associations between hyperuricemia (HUA) and atrial fibrillation (AF). Data was collected from 11 large-scale cross-sectional and cohort studies with a total of 608810 participants enrolled. And we confirmed that patients with hyperuricemia were easier to suffer from AF.
