# Supplementary material for: Hyperuricemia Increases the Risk of Atrial Fibrillation: A Systematic Review and Meta-Analysis
Source: Hindawi journal article supplement (doi:10.1155/2022/8172639), 2022-08-21
Supplement: f1 [file 8172639.f1.zip]

## Risk of bias domains

| Study |     | D1                                                                                  | D2                                                                                  | D3                                                                                  | D4                                                                                   | D5                                                                                    | D6                                                                                    | D7                                                                                    | Overall                                                                               |
|-------|-----|-------------------------------------------------------------------------------------|-------------------------------------------------------------------------------------|-------------------------------------------------------------------------------------|--------------------------------------------------------------------------------------|---------------------------------------------------------------------------------------|---------------------------------------------------------------------------------------|---------------------------------------------------------------------------------------|---------------------------------------------------------------------------------------|
|       | S1  |    |    |    |    |    |    |    |    |
|       | S2  |    |    |    |    |    |    |    |    |
|       | S3  |    |    |    |    |    |    |    |    |
|       | S4  |    |    |    |    |    |    |    |    |
|       | S5  |    |    |    |    |    |    |    |    |
|       | S6  |    |    |    |    |    |    |    |    |
|       | S7  |    |    |    |    |    |    |    |    |
|       | S8  |   |   |   |   |   |   |   |   |
|       | S9  |  |  |  |  |  |  |  |  |
|       | S10 |  |  |  |  |  |  |  |  |

## Domains:

D1: Bias due to confounding.

D2: Bias due to selection of participants.

D3: Bias in classification of interventions.

D4: Bias due to deviations from intended interventions.

D5: Bias due to missing data.

D6: Bias in measurement of outcomes.

D7: Bias in selection of the reported result.

## Judgement

 Critical Serious Moderate Low
