# Supplementary material for: Hyperuricemia Increases the Risk of Atrial Fibrillation: A Systematic Review and Meta-Analysis
Source: Hindawi journal article supplement (doi:10.1155/2022/8172639), 2022-08-21
Supplement: f1 [file 8172639.f1.zip]

# Supplements

s Figure 1. Summary of risk biases in the included studies.

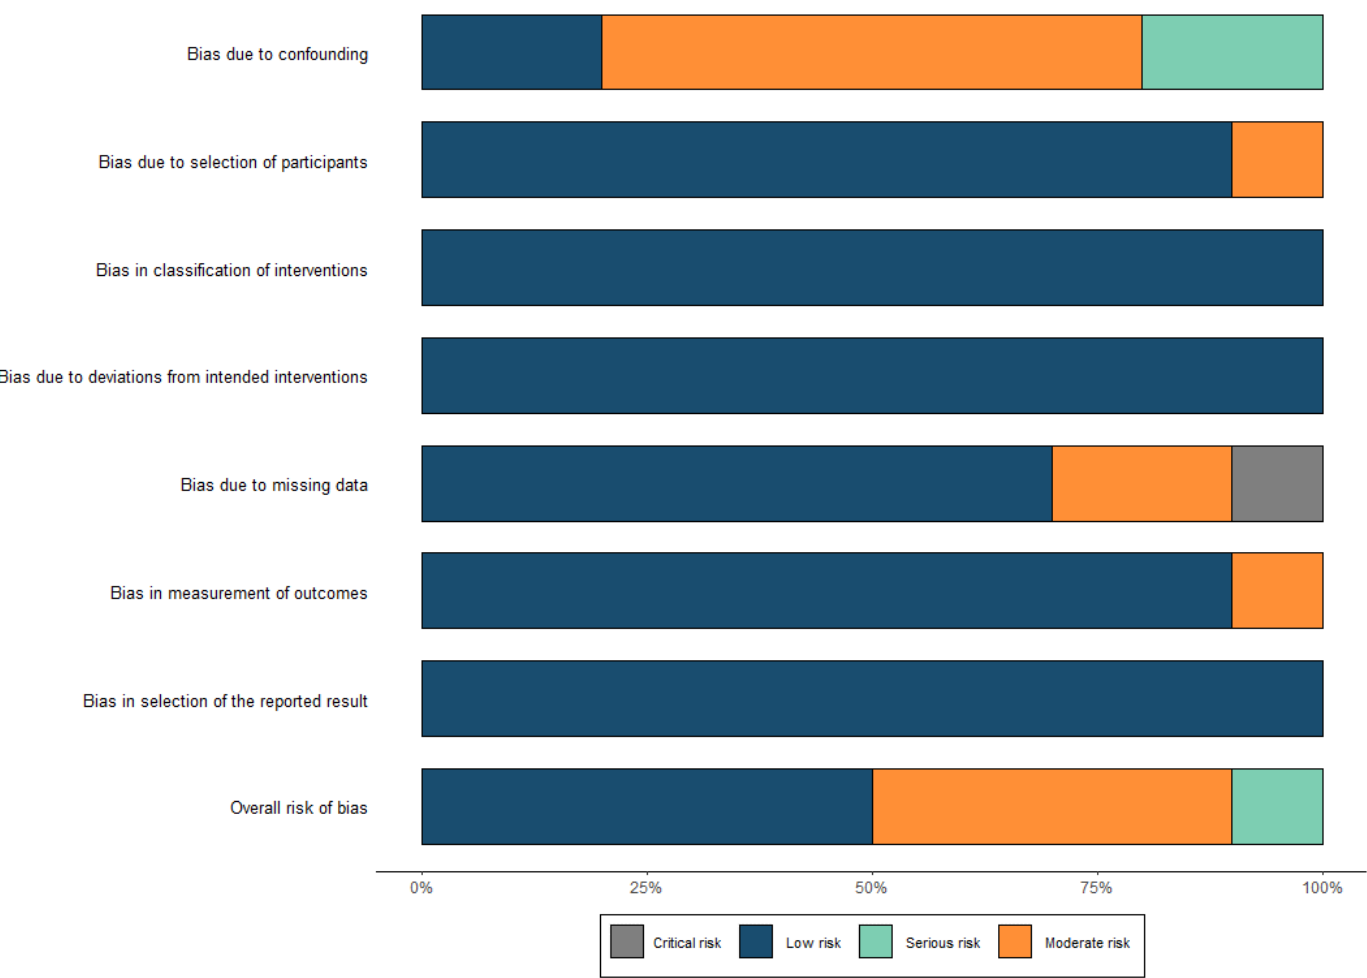

**s Figure 2. Risk biases of each study.**

|       |     | Risk of bias domains |    |    |    |    |    |    |         |
|-------|-----|----------------------|----|----|----|----|----|----|---------|
|       |     | D1                   | D2 | D3 | D4 | D5 | D6 | D7 | Overall |
| Study | S1  |                      |    |    |    |    |    |    |         |
|       | S2  |                      |    |    |    |    |    |    |         |
|       | S3  |                      |    |    |    |    |    |    |         |
|       | S4  |                      |    |    |    |    |    |    |         |
|       | S5  |                      |    |    |    |    |    |    |         |
|       | S6  |                      |    |    |    |    |    |    |         |
|       | S7  |                      |    |    |    |    |    |    |         |
|       | S8  |                      |    |    |    |    |    |    |         |
|       | S9  |                      |    |    |    |    |    |    |         |
|       | S10 |                      |    |    |    |    |    |    |         |

Domains:  
D1: Bias due to confounding.  
D2: Bias due to selection of participants.  
D3: Bias in classification of interventions.  
D4: Bias due to deviations from intended interventions.  
D5: Bias due to missing data.  
D6: Bias in measurement of outcomes.  
D7: Bias in selection of the reported result.

Judgement  
 Critical  
 Serious  
 Moderate  
 Low

**s Fig 3 Meta-regression details of the current drinker's ratio.**

Mixed-Effects Model (k = 5; tau<sup>2</sup> estimator: REML)

tau<sup>2</sup> (estimated amount of residual heterogeneity): 0 (SE = 0.0232)  
tau (square root of estimated tau<sup>2</sup> value): 0  
I<sup>2</sup> (residual heterogeneity / unaccounted variability): 0.00%  
H<sup>2</sup> (unaccounted variability / sampling variability): 1.00  
R<sup>2</sup> (amount of heterogeneity accounted for): 100.00%

Test for Residual Heterogeneity:  
QE(df = 3) = 1.6346, p-val = 0.6516

Test of Moderators (coefficient 2):  
QM(df = 1) = 41.0069, p-val < .0001

Model Results:

|          | estimate | se     | zval   | pval   | ci.lb  | ci.ub  |     |
|----------|----------|--------|--------|--------|--------|--------|-----|
| intrcpt  | 0.4180   | 0.1167 | 3.5831 | 0.0003 | 0.1893 | 0.6466 | *** |
| Drinking | 2.0054   | 0.3132 | 6.4037 | <.0001 | 1.3916 | 2.6192 | *** |

---  
Signif. codes: 0 '\*\*\*' 0.001 '\*\*' 0.01 '\*' 0.05 '.' 0.1 ' ' 1

s Fig 4A~4F. Regression curves of covariates

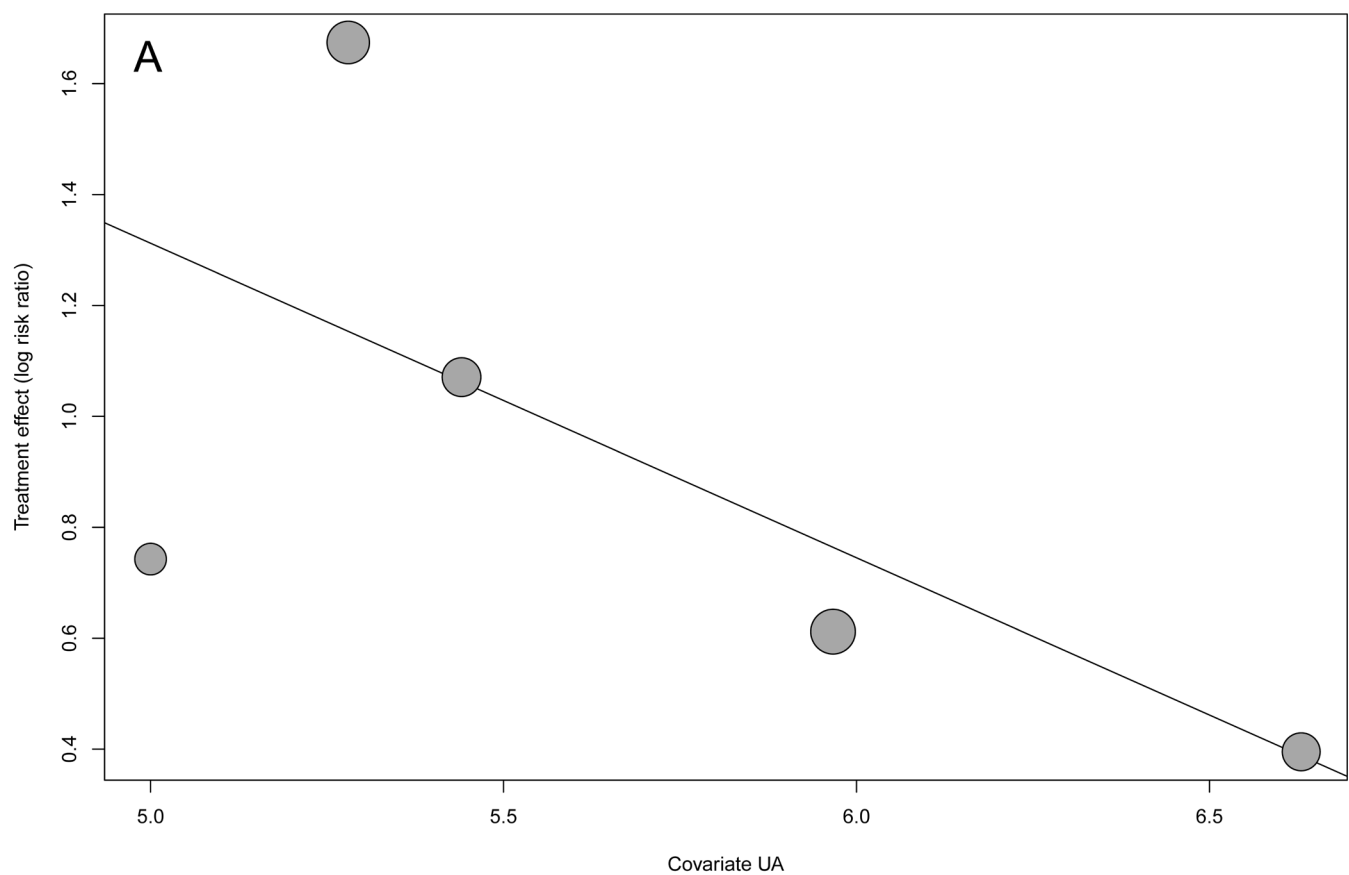

s Fig 4A

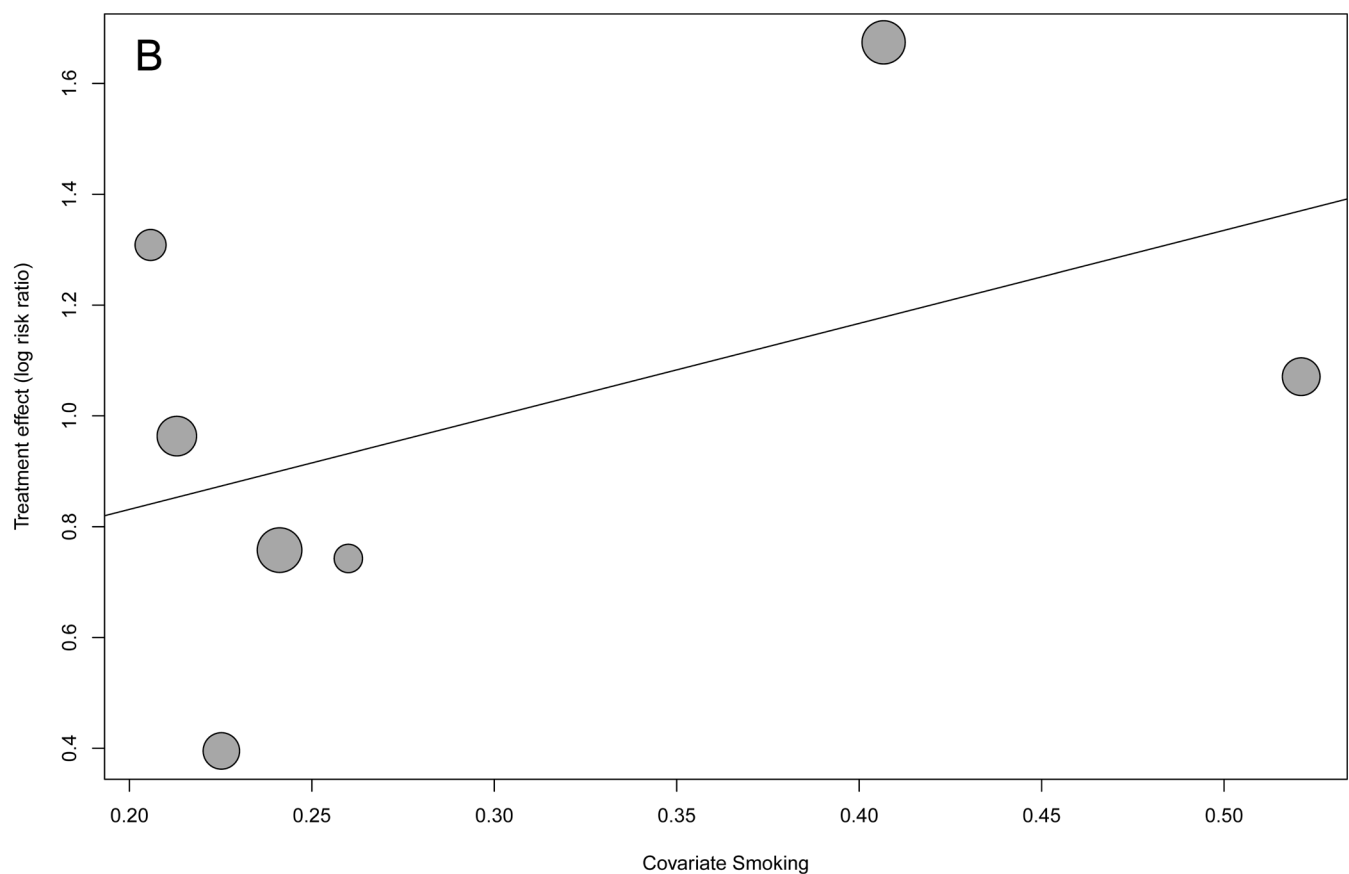

s Fig 4B

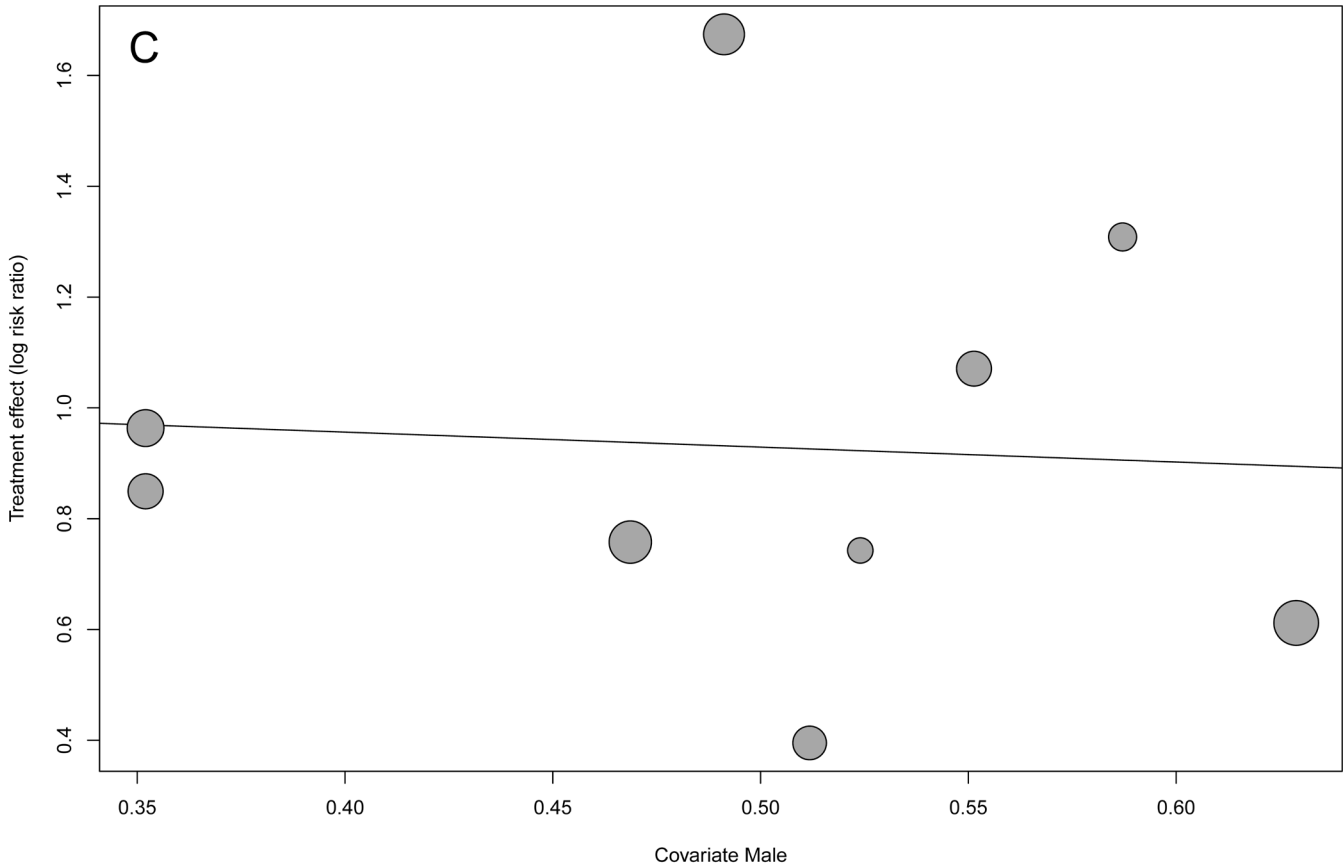

s Fig 4C

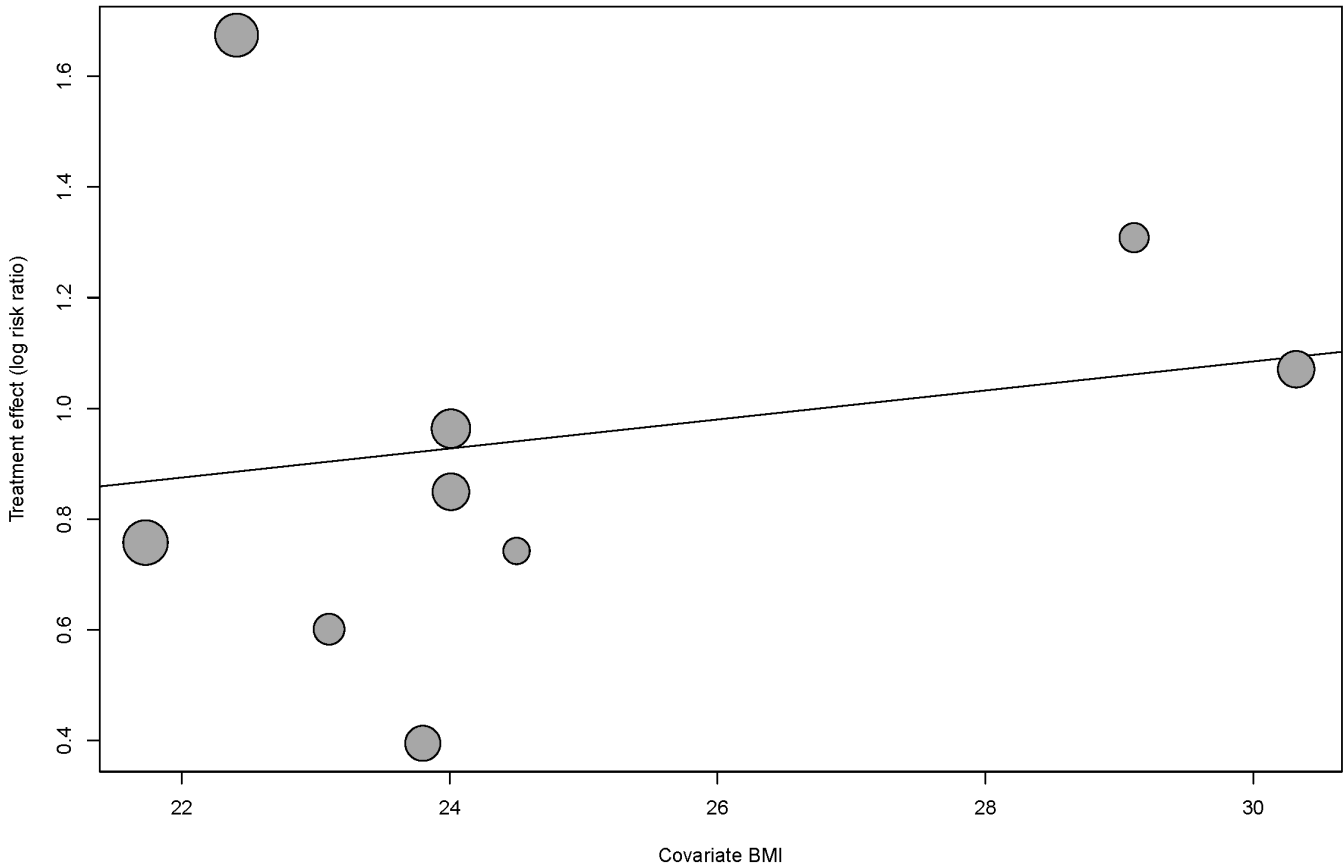

s Fig 4D

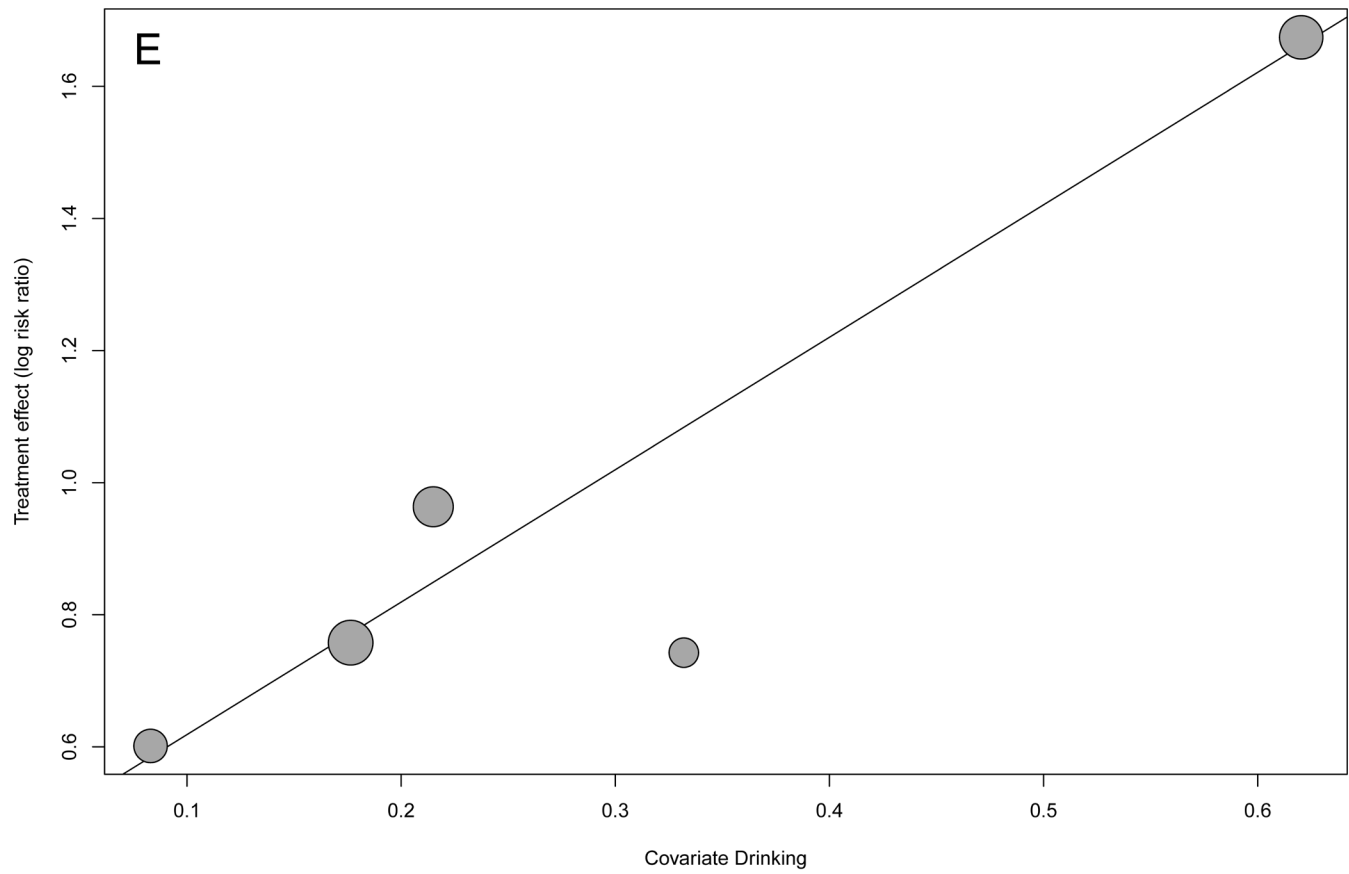

s Fig 4E

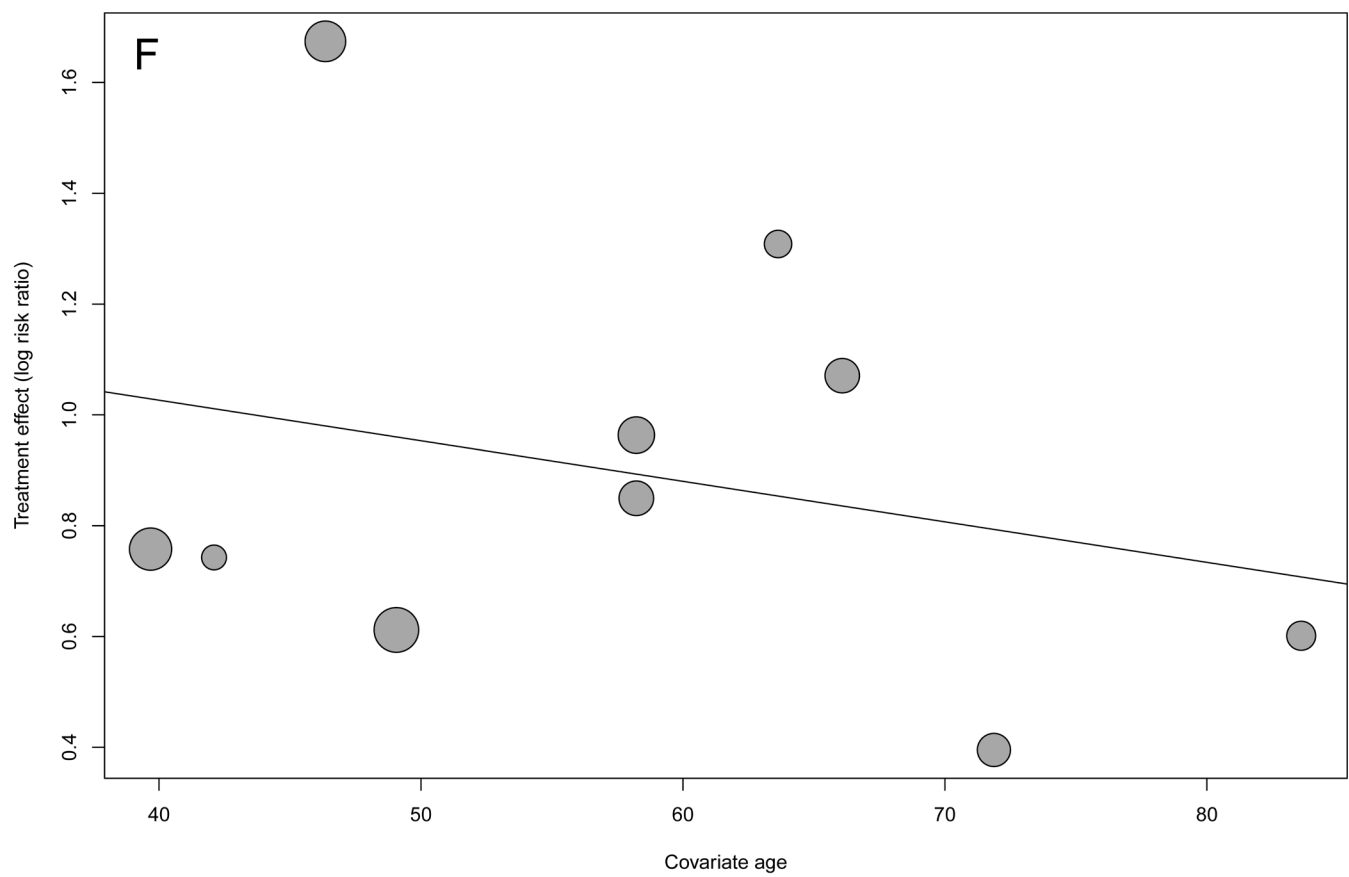

s Fig 4F

s Fig 5. Sensitivity analysis.

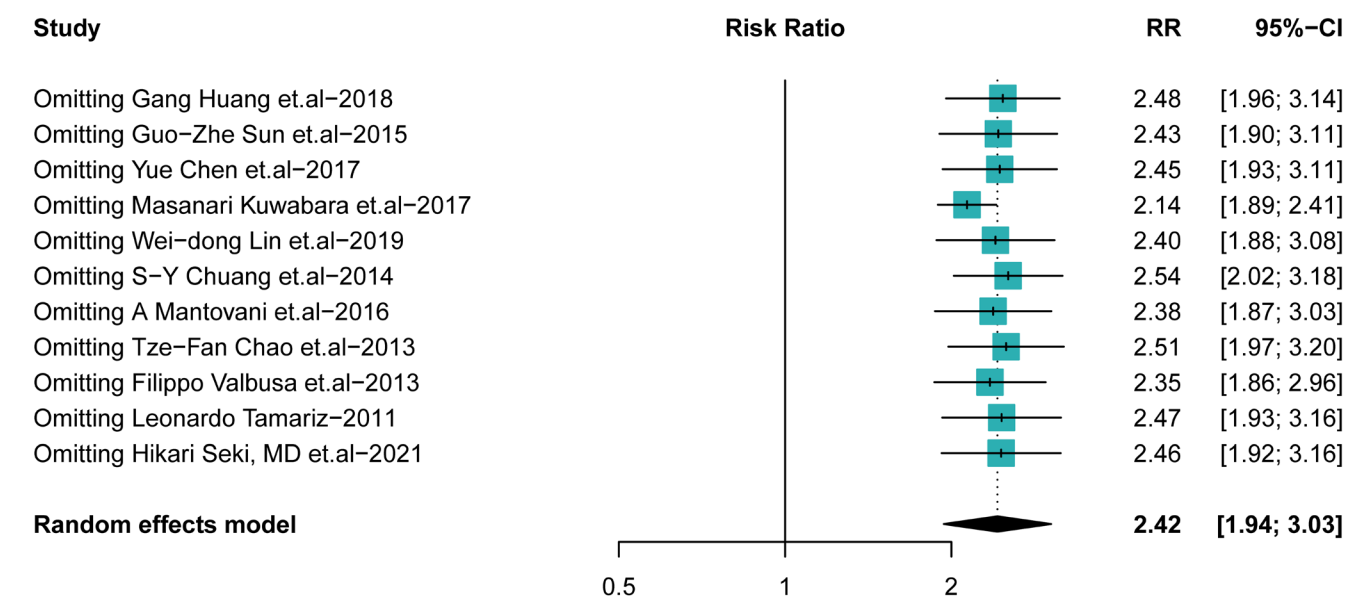

s Fig 6. Deek's funnel plot

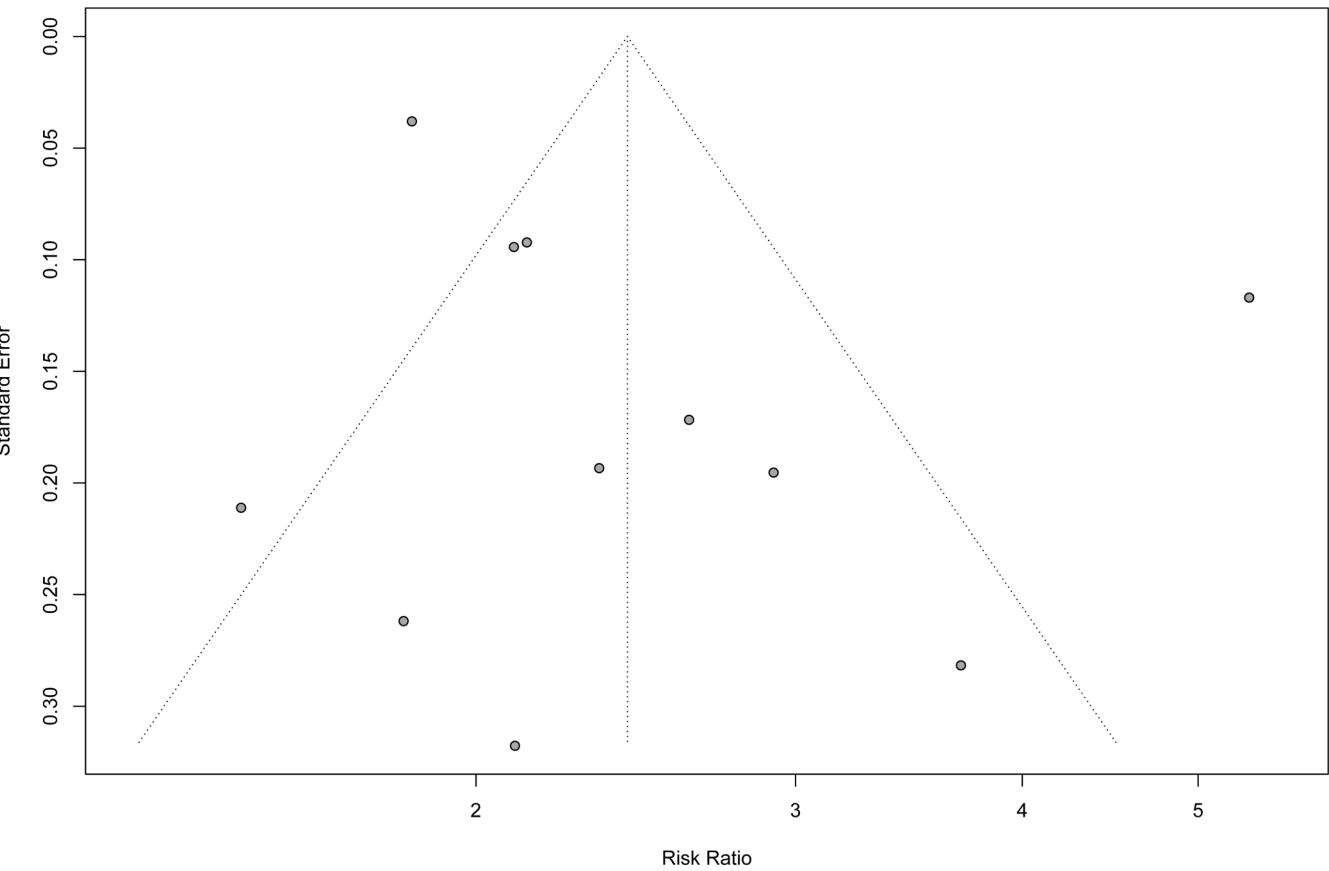

s Fig 7 Peter's test.

Linear regression test of funnel plot asymmetry

Test result: t = 1.45, df = 9, p-value = 0.1824

Sample estimates:  
bias se.bias intercept se.intercept  
1.9607 1.3568 0.5881 0.1332

- Details:
- multiplicative residual heterogeneity variance ( $\tau^2 = 7.8565$ )
  - predictor: standard error
  - weight: inverse variance
  - reference: Egger et al. (1997), BMJ

s Fig 8 Subgroup analysis for RAAS blocker users of more or less than 50%.

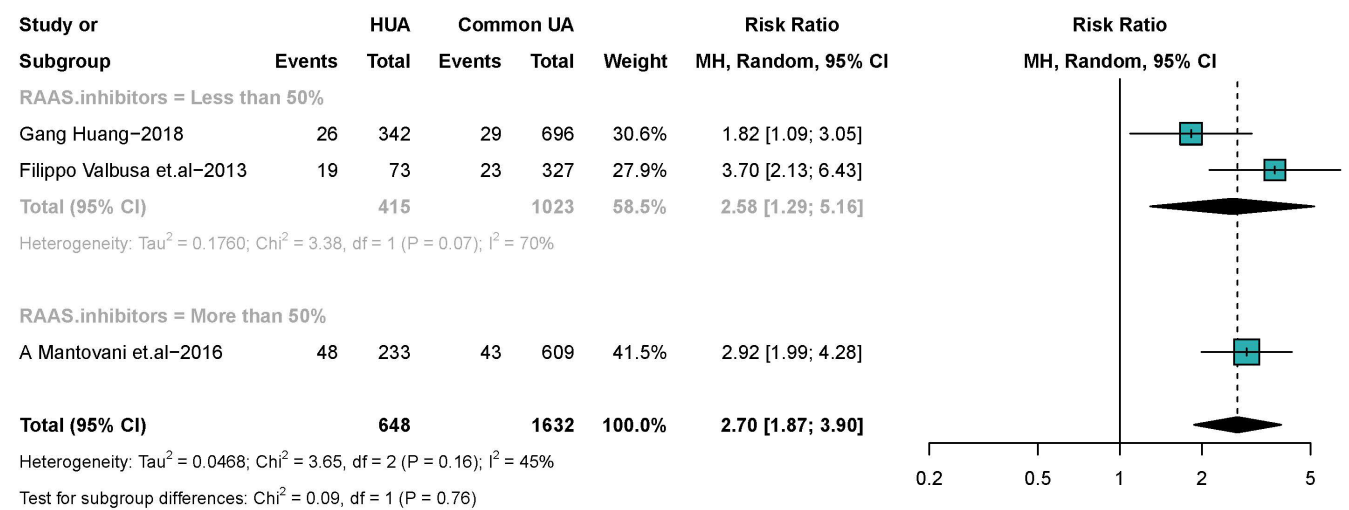

s Fig 9 Meta-regression of eGFR

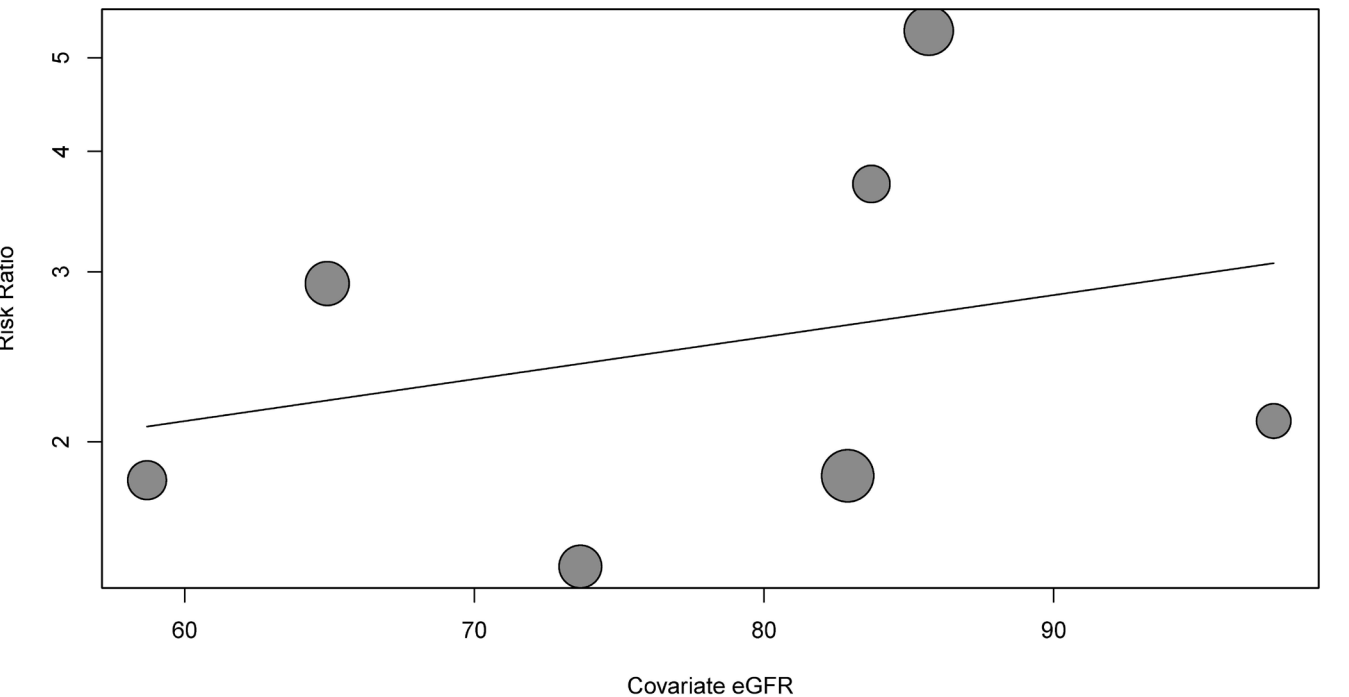

**s Table 1. Sensitivity analysis.**

| <b>Influential analysis (Random effects model)</b>             |                      |                  |        |
|----------------------------------------------------------------|----------------------|------------------|--------|
| <b>Risk ratio</b>                                              |                      |                  |        |
|                                                                | <b>RR</b>            | <b>95%-CI</b>    |        |
| Omitting Gang Huang et.al-2018                                 | 2.4792               | [1.9557; 3.1428] |        |
| Omitting Guo-Zhe Sun et.al-2015                                | 2.4322               | [1.9030; 3.1087] |        |
| Omitting Yue Chen et.al-2017                                   | 2.4472               | [1.9287; 3.1051] |        |
| Omitting Masanari Kuwabara et.al-2017                          | 2.1354               | [1.8904; 2.4122] |        |
| Omitting Wei-dong Lin et.al-2019                               | 2.4043               | [1.8797; 3.0753] |        |
| Omitting S-Y Chuang et.al-2014                                 | 2.5350               | [2.0213; 3.1794] |        |
| Omitting A Mantovani et.al-2016                                | 2.3806               | [1.8678; 3.0342] |        |
| Omitting Tze-Fan Chao et.al-2013                               | 2.5127               | [1.9749; 3.1970] |        |
| Omitting Filippo Valbusa et.al-2013                            | 2.3492               | [1.8628; 2.9627] |        |
| Omitting Leonardo Tamariz-2011                                 | 2.4665               | [1.9251; 3.1600] |        |
| Omitting Hikari Seki, MD et.al-2021                            | 2.4616               | [1.9201; 3.1558] |        |
| <b>Pooled estimate</b>                                         | 2.4239               | [1.9383; 3.0311] |        |
|                                                                | p-value              | tau <sup>2</sup> | tau    |
| Omitting Gang Huang et.al-2018                                 | < 0.0001             | 0.1156           | 0.3400 |
| Omitting Guo-Zhe Sun et.al-2015                                | < 0.0001             | 0.1232           | 0.3511 |
| Omitting Yue Chen et.al-2017                                   | < 0.0001             | 0.1184           | 0.3441 |
| Omitting Masanari Kuwabara et.al-2017                          | < 0.0001             | 0.0145           | 0.1202 |
| Omitting Wei-dong Lin et.al-2019                               | < 0.0001             | 0.1234           | 0.3513 |
| Omitting S-Y Chuang et.al-2014                                 | < 0.0001             | 0.1015           | 0.3186 |
| Omitting A Mantovani et.al-2016                                | < 0.0001             | 0.1199           | 0.3462 |
| Omitting Tze-Fan Chao et.al-2013                               | < 0.0001             | 0.1133           | 0.3365 |
| Omitting Filippo Valbusa et.al-2013                            | < 0.0001             | 0.1101           | 0.3318 |
| Omitting Leonardo Tamariz-2011                                 | < 0.0001             | 0.1229           | 0.3506 |
| Omitting Hikari Seki, MD et.al-2021                            | < 0.0001             | 0.1237           | 0.3517 |
| <b>Pooled estimate</b>                                         | < 0.0001             | 0.1097           | 0.3312 |
| <b>Heterogeneity</b>                                           | <b>I<sup>2</sup></b> |                  |        |
| Omitting Gang Huang et.al-2018                                 | 89.6%                |                  |        |
| Omitting Guo-Zhe Sun et.al-2015                                | 89.6%                |                  |        |
| Omitting Yue Chen et.al-2017                                   | 89.7%                |                  |        |
| Omitting Masanari Kuwabara et.al-2017                          | 52.0%                |                  |        |
| Omitting Wei-dong Lin et.al-2019                               | 89.5%                |                  |        |
| Omitting S-Y Chuang et.al-2014                                 | 89.3%                |                  |        |
| Omitting A Mantovani et.al-2016                                | 89.3%                |                  |        |
| Omitting Tze-Fan Chao et.al-2013                               | 84.7%                |                  |        |
| Omitting Filippo Valbusa et.al-2013                            | 89.2%                |                  |        |
| Omitting Leonardo Tamariz-2011                                 | 89.7%                |                  |        |
| Omitting Hikari Seki, MD et.al-2021                            | 89.7%                |                  |        |
| Pooled estimate                                                | 88.5%                |                  |        |
| Details on meta-analytical method:                             |                      |                  |        |
| - Mantel-Haenszel method                                       |                      |                  |        |
| - Restricted maximum-likelihood estimator for tau <sup>2</sup> |                      |                  |        |



## s Appendix 1. Search strategy.

### Search strategy

| Number |                                                                                                                                                             |
|--------|-------------------------------------------------------------------------------------------------------------------------------------------------------------|
| #1     | Atheromatous Plaques 【Title/Abstract】                                                                                                                       |
| #2     | Acid, Uric 【Title/Abstract】                                                                                                                                 |
| #3     | 2,6,8-Trihydroxypurine 【Title/Abstract】                                                                                                                     |
| #4     | Trioxopurine 【Title/Abstract】                                                                                                                               |
| #5     | Potassium Urate 【Title/Abstract】                                                                                                                            |
| #6     | Urate, Potassium 【Title/Abstract】                                                                                                                           |
| #7     | Urate 【Title/Abstract】                                                                                                                                      |
| #8     | Ammonium Acid Urate 【Title/Abstract】                                                                                                                        |
| #9     | Acid Urate, Ammonium 【Title/Abstract】                                                                                                                       |
| #10    | Urate, Ammonium Acid 【Title/Abstract】                                                                                                                       |
| #11    | Sodium Urate Monohydrate 【Title/Abstract】                                                                                                                   |
| #12    | Monohydrate, Sodium Urate 【Title/Abstract】                                                                                                                  |
| #13    | Urate Monohydrate, Sodium 【Title/Abstract】                                                                                                                  |
| #14    | Monosodium Urate Monohydrate 【Title/Abstract】                                                                                                               |
| #15    | Monohydrate, Monosodium Urate 【Title/Abstract】                                                                                                              |
| #16    | Urate Monohydrate, Monosodium 【Title/Abstract】                                                                                                              |
| #17    | Sodium Acid Urate Monohydrate 【Title/Abstract】                                                                                                              |
| #18    | Sodium Urate 【Title/Abstract】                                                                                                                               |
| #19    | Urate, Sodium 【Title/Abstract】                                                                                                                              |
| #20    | Monosodium Urate 【Title/Abstract】                                                                                                                           |
| #21    | Urate, Monosodium 【Title/Abstract】                                                                                                                          |
| #22    | Sodium Acid Urate 【Title/Abstract】                                                                                                                          |
| #23    | Acid Urate, Sodium 【Title/Abstract】                                                                                                                         |
| #24    | Urate, Sodium Acid 【Title/Abstract】                                                                                                                         |
| #25    | #1 or #2 or #3 or #4 or #5 or #6 or #7 or #8 or #9 or #10 or #11 or #12 or #13 or #14 or #15 or #16 or #17 or #18 or #19 or #20 or #21 or #22 or #23 or #24 |
| #26    | Atrial Fibrillations 【Title/Abstract】                                                                                                                       |
| #27    | Fibrillation, Atrial 【Title/Abstract】                                                                                                                       |
| #28    | Fibrillations, Atrial 【Title/Abstract】                                                                                                                      |
| #29    | Auricular Fibrillation 【Title/Abstract】                                                                                                                     |
| #30    | Auricular Fibrillations 【Title/Abstract】                                                                                                                    |
| #31    | Fibrillation, Auricular 【Title/Abstract】                                                                                                                    |
| #32    | Fibrillations, Auricular 【Title/Abstract】                                                                                                                   |
| #33    | Persistent Atrial Fibrillation 【Title/Abstract】                                                                                                             |
| #34    | Atrial Fibrillation, Persistent 【Title/Abstract】                                                                                                            |
| #35    | Atrial Fibrillations, Persistent 【Title/Abstract】                                                                                                           |
| #36    | Fibrillation, Persistent Atrial 【Title/Abstract】                                                                                                            |
| #37    | Fibrillations, Persistent Atrial 【Title/Abstract】                                                                                                           |
| #38    | Persistent Atrial Fibrillations 【Title/Abstract】                                                                                                            |
| #39    | Familial Atrial Fibrillation 【Title/Abstract】                                                                                                               |
| #40    | Atrial Fibrillation, Familial 【Title/Abstract】                                                                                                              |
| #41    | Atrial Fibrillations, Familial 【Title/Abstract】                                                                                                             |
| #42    | Familial Atrial Fibrillations 【Title/Abstract】                                                                                                              |
| #43    | Fibrillation, Familial Atrial 【Title/Abstract】                                                                                                              |
| #44    | Fibrillations, Familial Atrial 【Title/Abstract】                                                                                                             |
| #45    | Paroxysmal Atrial Fibrillation 【Title/Abstract】                                                                                                             |
| #46    | Atrial Fibrillation, Paroxysmal 【Title/Abstract】                                                                                                            |
| #47    | Atrial Fibrillations, Paroxysmal 【Title/Abstract】                                                                                                           |
| #48    | Fibrillation, Paroxysmal Atrial 【Title/Abstract】                                                                                                            |
| #49    | Fibrillations, Paroxysmal Atrial 【Title/Abstract】                                                                                                           |

|     |                                                                                                                                                                             |
|-----|-----------------------------------------------------------------------------------------------------------------------------------------------------------------------------|
| #50 | Paroxysmal Atrial Fibrillations 【Title/Abstract】                                                                                                                            |
| #51 | #26 or #27 or #28 or #29 or #30 or #31 or #32 or #33 or #34 or #35 or #36 or #37 or #38 or #39 or #40 or #41 or #42 or #43 or #44 or #45 or #46 or #47 or #48 or #49 or #50 |
| #52 | Metabolic disorder 【Title/Abstract】                                                                                                                                         |
| #53 | endocrine disorder 【Title/Abstract】                                                                                                                                         |
| #54 | #52 or #53                                                                                                                                                                  |
| #55 | #25 or #54                                                                                                                                                                  |
| #56 | #55 or #51                                                                                                                                                                  |

**Legends:**

s Fig 1 summarizes qualities of literatures included in the present review.

s Fig 2 describes risk of biases in each study included.

s Fig 3 describe the meta-regression details of the current drinker's ratio in R studio work station.

s Fig 4A~4F are meta-regression curves of covariates; A, meta-regression of uric acid; B, meta-regression of smoking; C, meta-regression of male proportion; D, meta-regression of BMI; E, meta-regression of current drinking; F, meta-regression of average age.

s Fig 5 is a forest plot of sensitivity analysis of the main outcome.

s Fig 6 intuitively reflects the publication bias.

s Fig 7 linearly quantifies publication bias.

s Fig 8 is the subgroup analysis for RAAS blocker users of more or less than 50%.

S Fig 9 is the meta-regression curve of estimated glomerular filtration rate eGFR

s Table 1 shows details of sensitivity analysis

s Appendix 1 is a comprehensive description of the retrieval strategy used in article identifying.
