# Supplementary material for: Hyperuricemia Increases the Risk of Atrial Fibrillation: A Systematic Review and Meta-Analysis
Source: Hindawi journal article supplement (doi:10.1155/2022/8172639), 2022-08-21
Supplement: f1 [file 8172639.f1.zip]

## Linear regression test of funnel plot asymmetry

Test result:  $t = 1.45$ ,  $df = 9$ ,  $p\text{-value} = 0.1824$

### Sample estimates:

| bias   | se.bias | intercept | se.intercept |
|--------|---------|-----------|--------------|
| 1.9607 | 1.3568  | 0.5881    | 0.1332       |

### Details:

- multiplicative residual heterogeneity variance ( $\tau^2 = 7.8565$ )
- predictor: standard error
- weight: inverse variance
- reference: Egger et al. (1997), BMJ
