# Supplementary material for: Hyperuricemia Increases the Risk of Atrial Fibrillation: A Systematic Review and Meta-Analysis
Source: Int J Endocrinol. 2022 Aug 21;2022:8172639. doi: 10.1155/2022/8172639 (PMC9420608; doi:10.1155/2022/8172639)
Supplement: Supplementary Materials — 1. Supplements. To make our work more organized, some pictures or tables were put in a supplementary material named Supplements. All the pictures and tables in the Supplements were cited and illustrated in the article. 2. Graphical Abstract Image. A graphical abstract, concise and comprehensive of the main contribution of our work. 3. Graphical Abstract Text. A short explanation of our graphical abstract. [file 8172639.f1.zip]

Archive with 19 entries (19 files):
- Graphical_Abstract_Image.jpg
- Graphical_Abstract_Text.pdf
- Supplements (1).pdf
- Supplements, s Appendix 1.docx
- Supplements, s Figure 1.pdf
- Supplements, s Figure 2.pdf
- Supplements, s Figure 3.pdf
- Supplements, s Figure 4A.pdf
- Supplements, s Figure 4B.pdf
- Supplements, s Figure 4C.pdf
- Supplements, s Figure 4D.pdf
- Supplements, s Figure 4E.pdf
- Supplements, s Figure 4F.pdf
- Supplements, s Figure 5.pdf
- Supplements, s Figure 6.pdf
- Supplements, s Figure 7.pdf
- Supplements, s Figure 8.pdf
- Supplements, s Figure 9.pdf
- Supplements, s Table 1.docx
