# Supplementary figures and images for: Hyperuricemia Increases the Risk of Atrial Fibrillation: A Systematic Review and Meta-Analysis
Source: Hindawi journal article supplement (doi:10.1155/2022/8172639), 2022-08-21

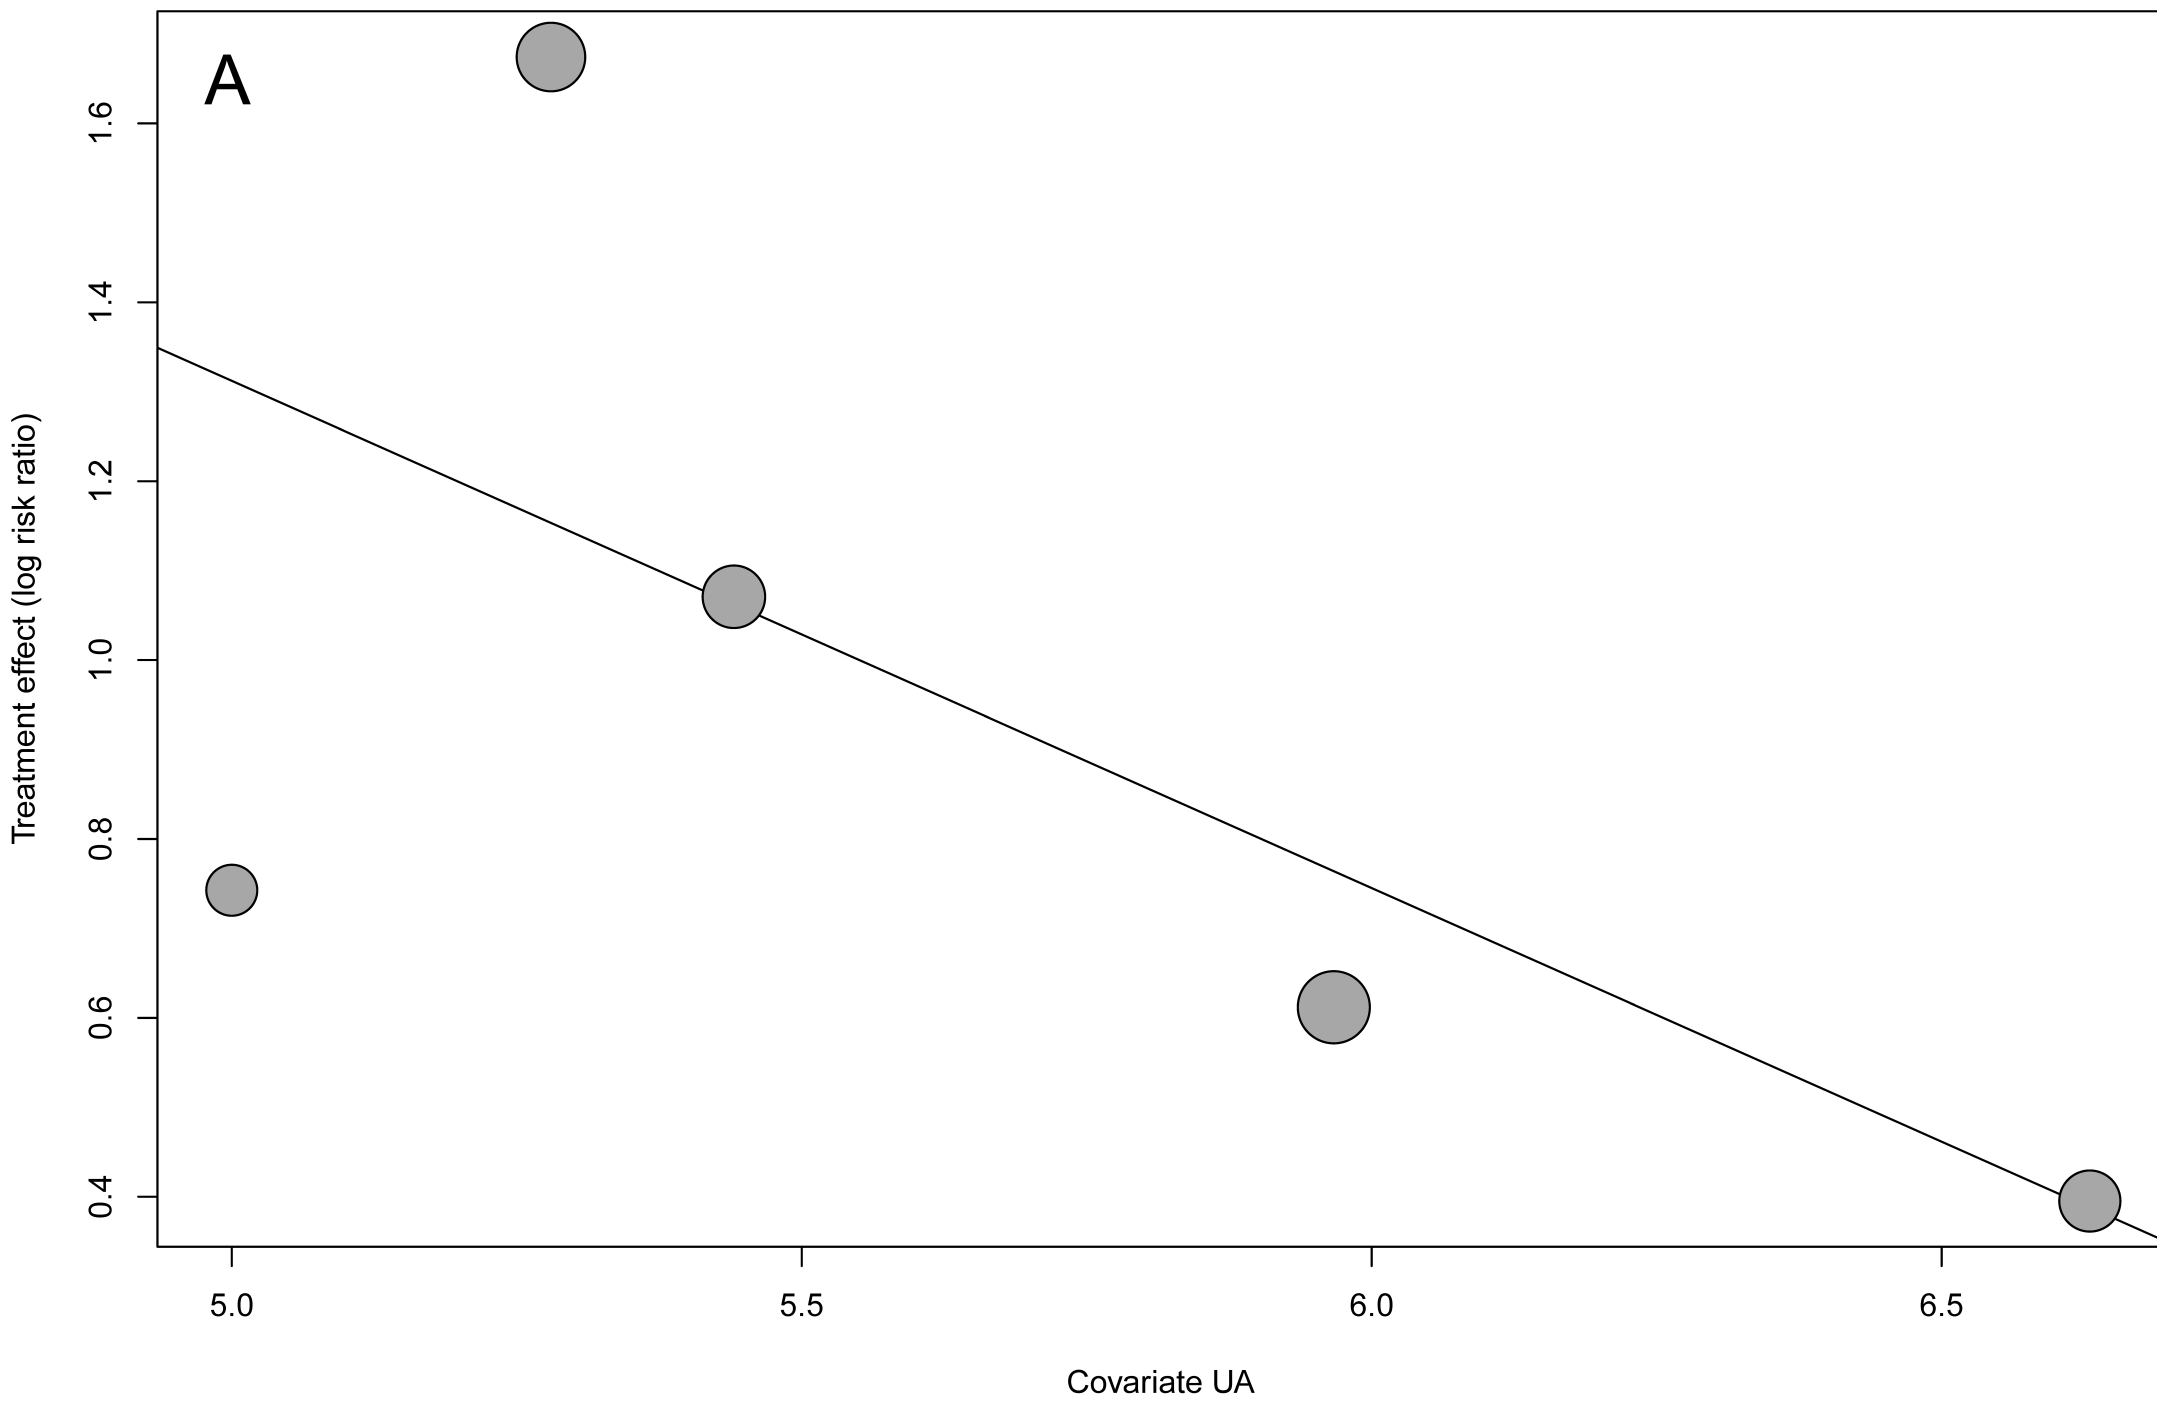

Supplement: f1 [file 8172639.f1.zip]

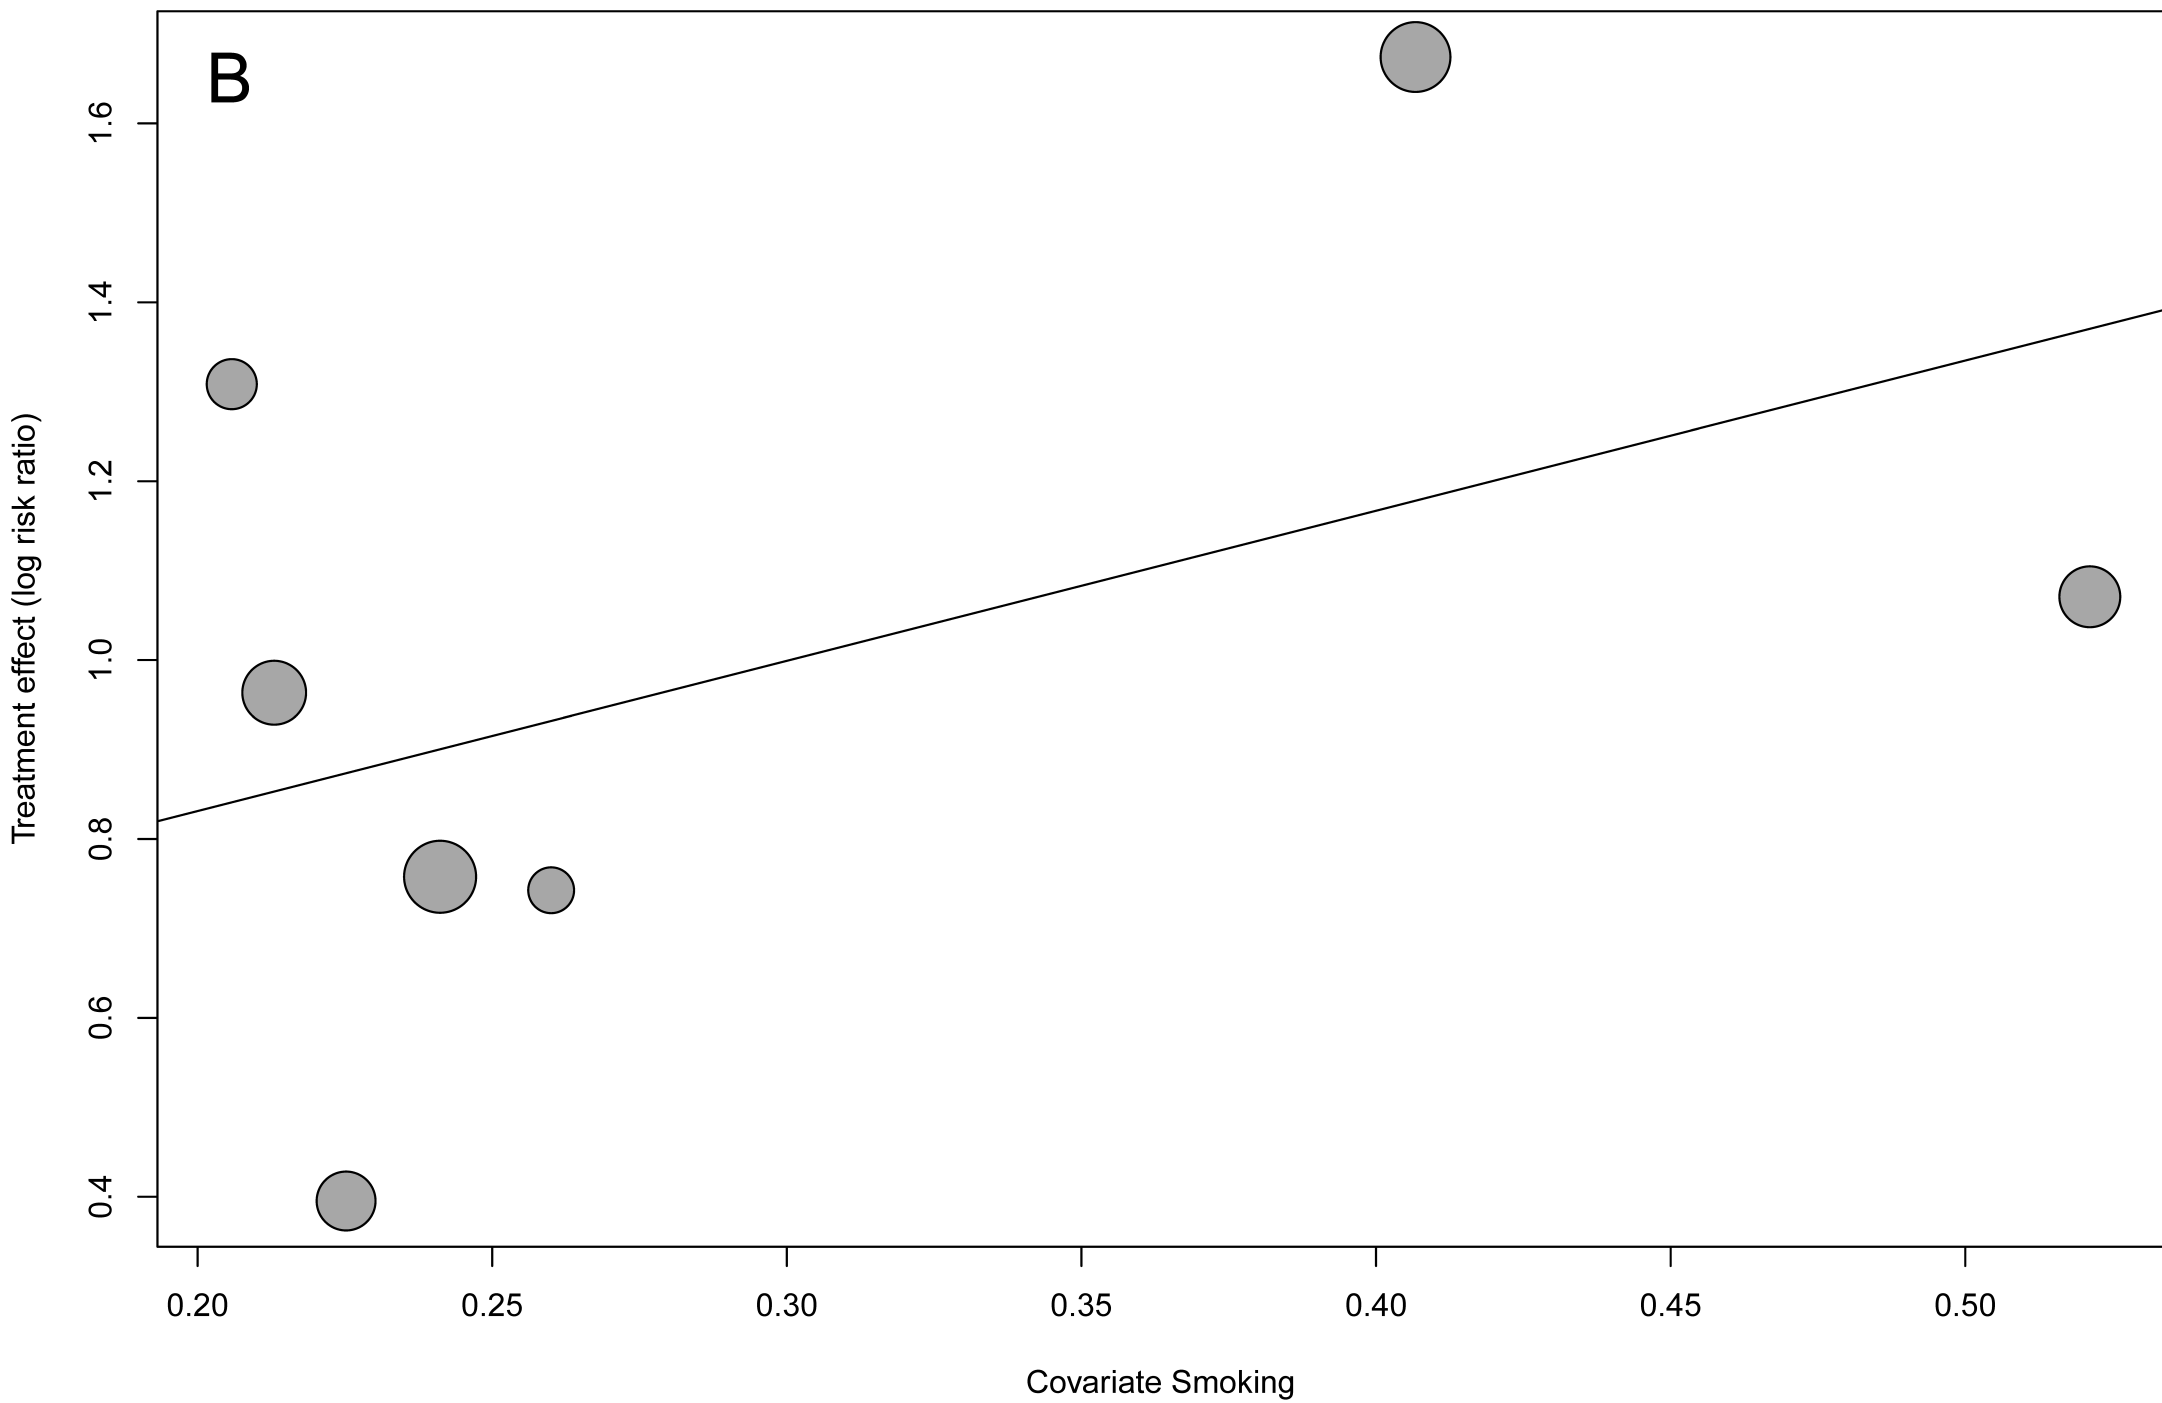

Supplement: f1 [file 8172639.f1.zip]

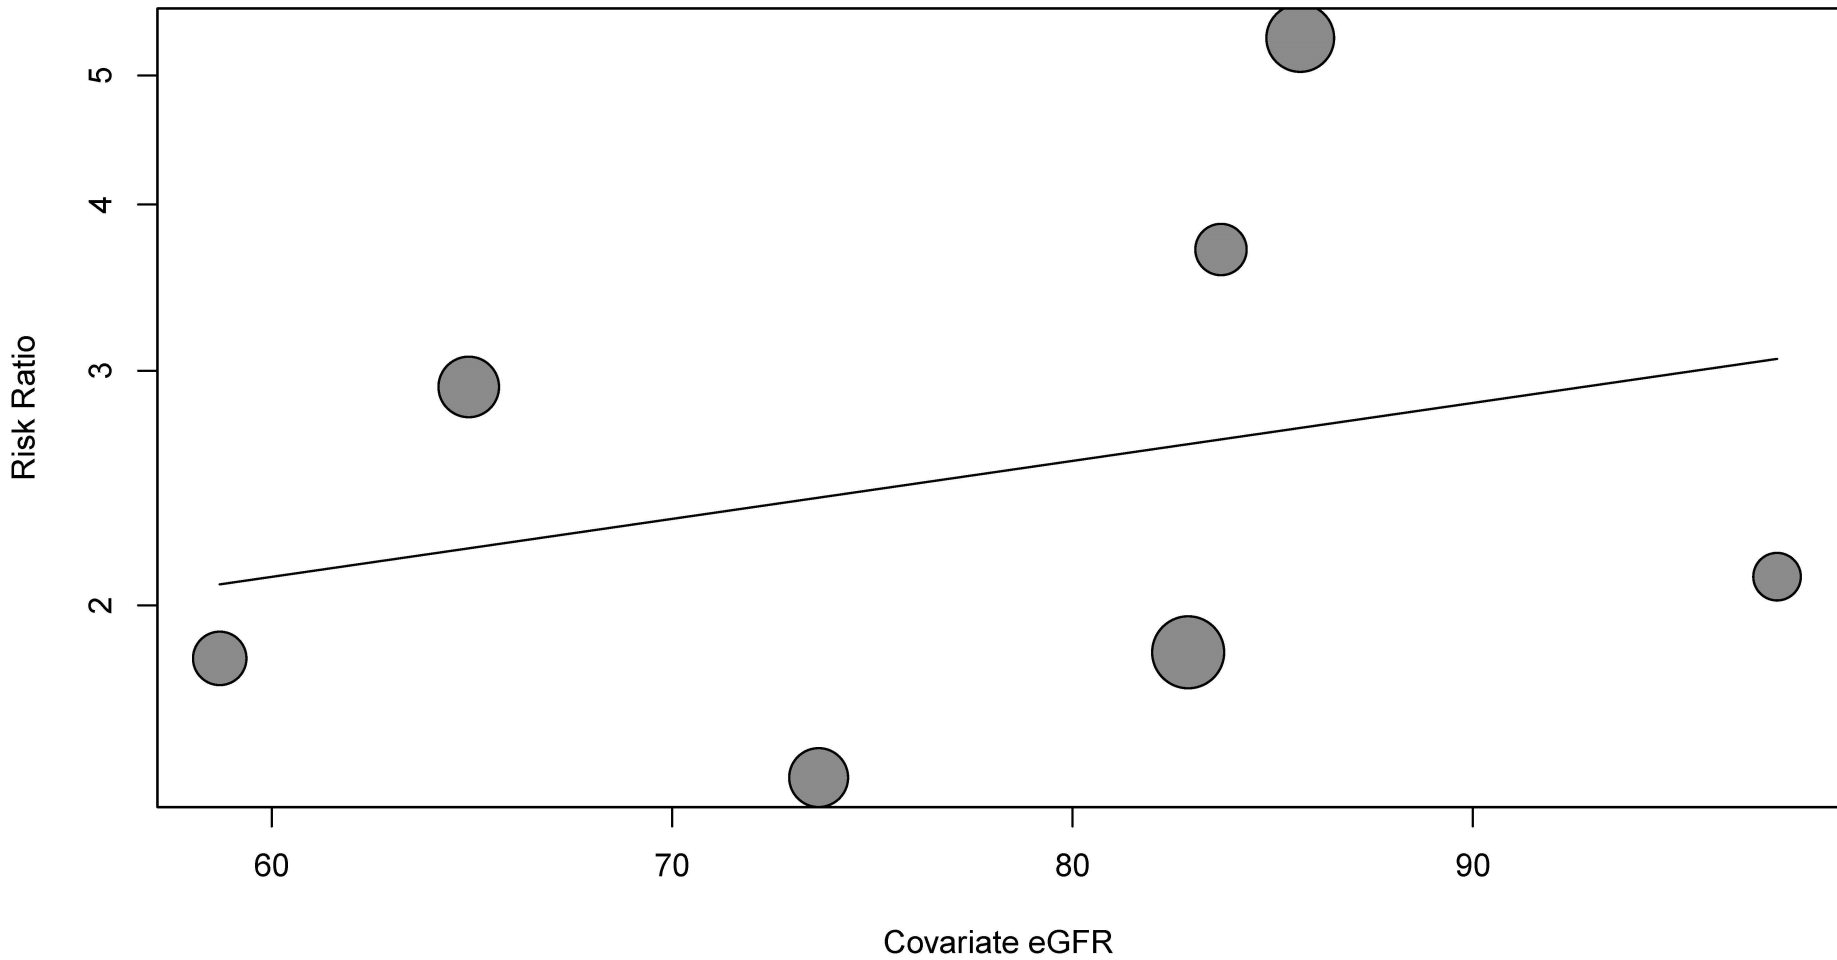

Supplement: f1 [file 8172639.f1.zip]

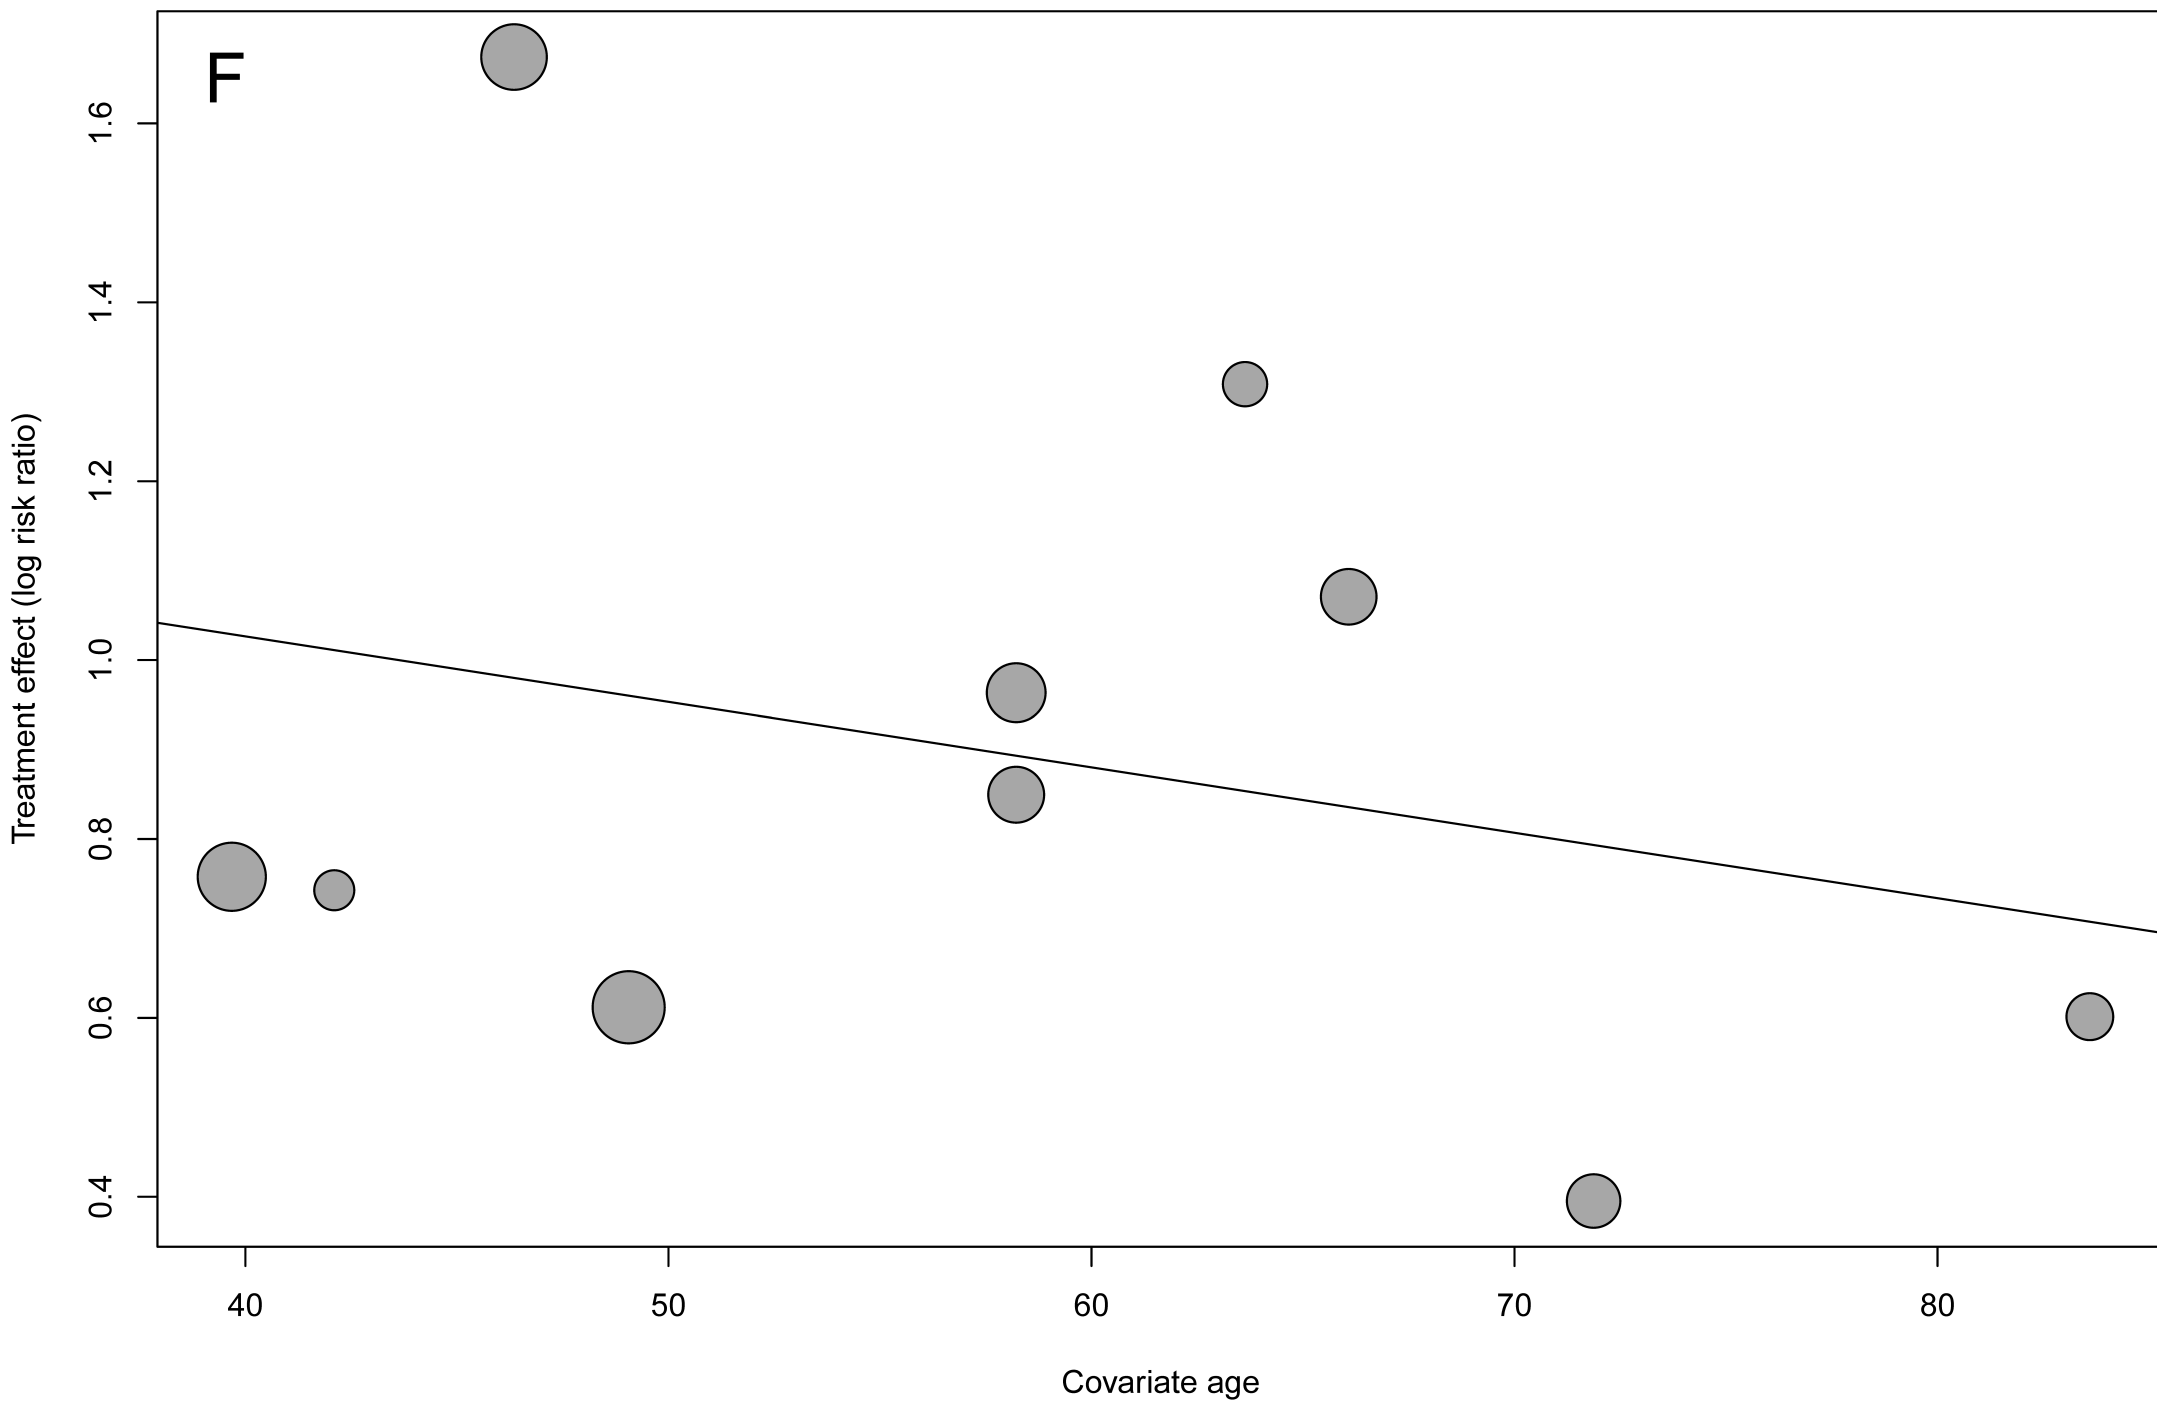

Supplement: f1 [file 8172639.f1.zip]

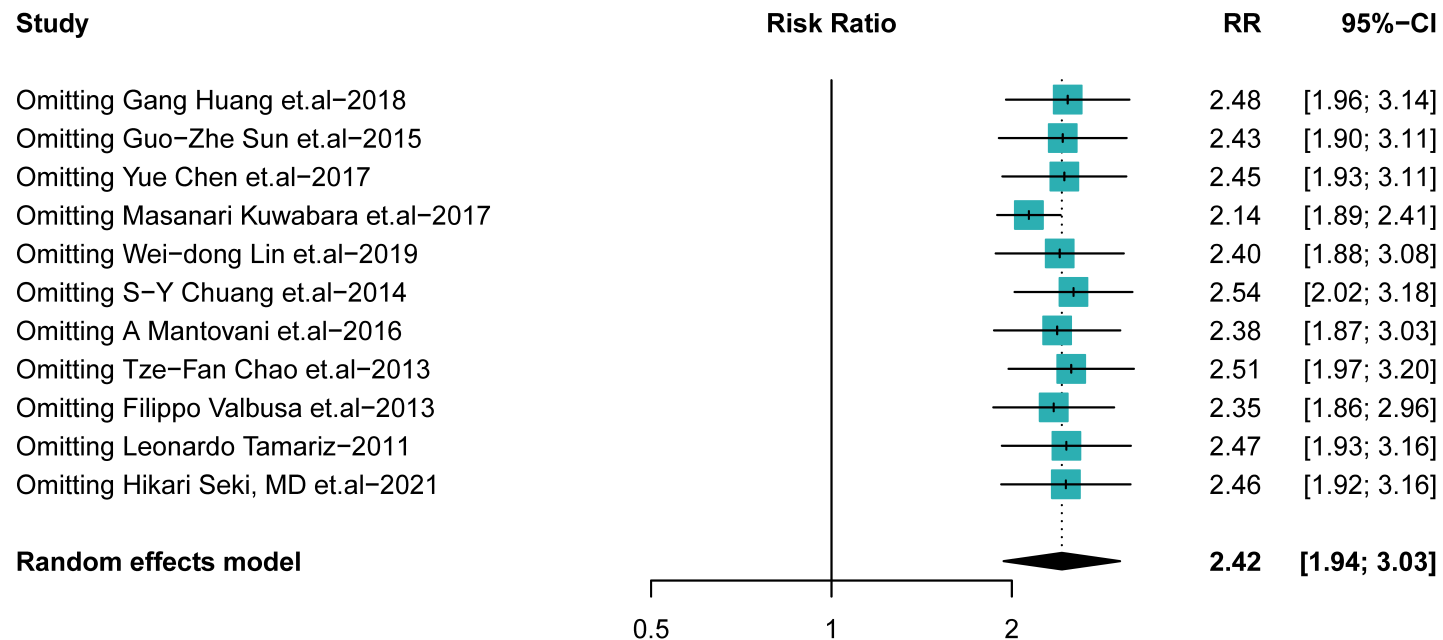

Supplement: f1 [file 8172639.f1.zip]

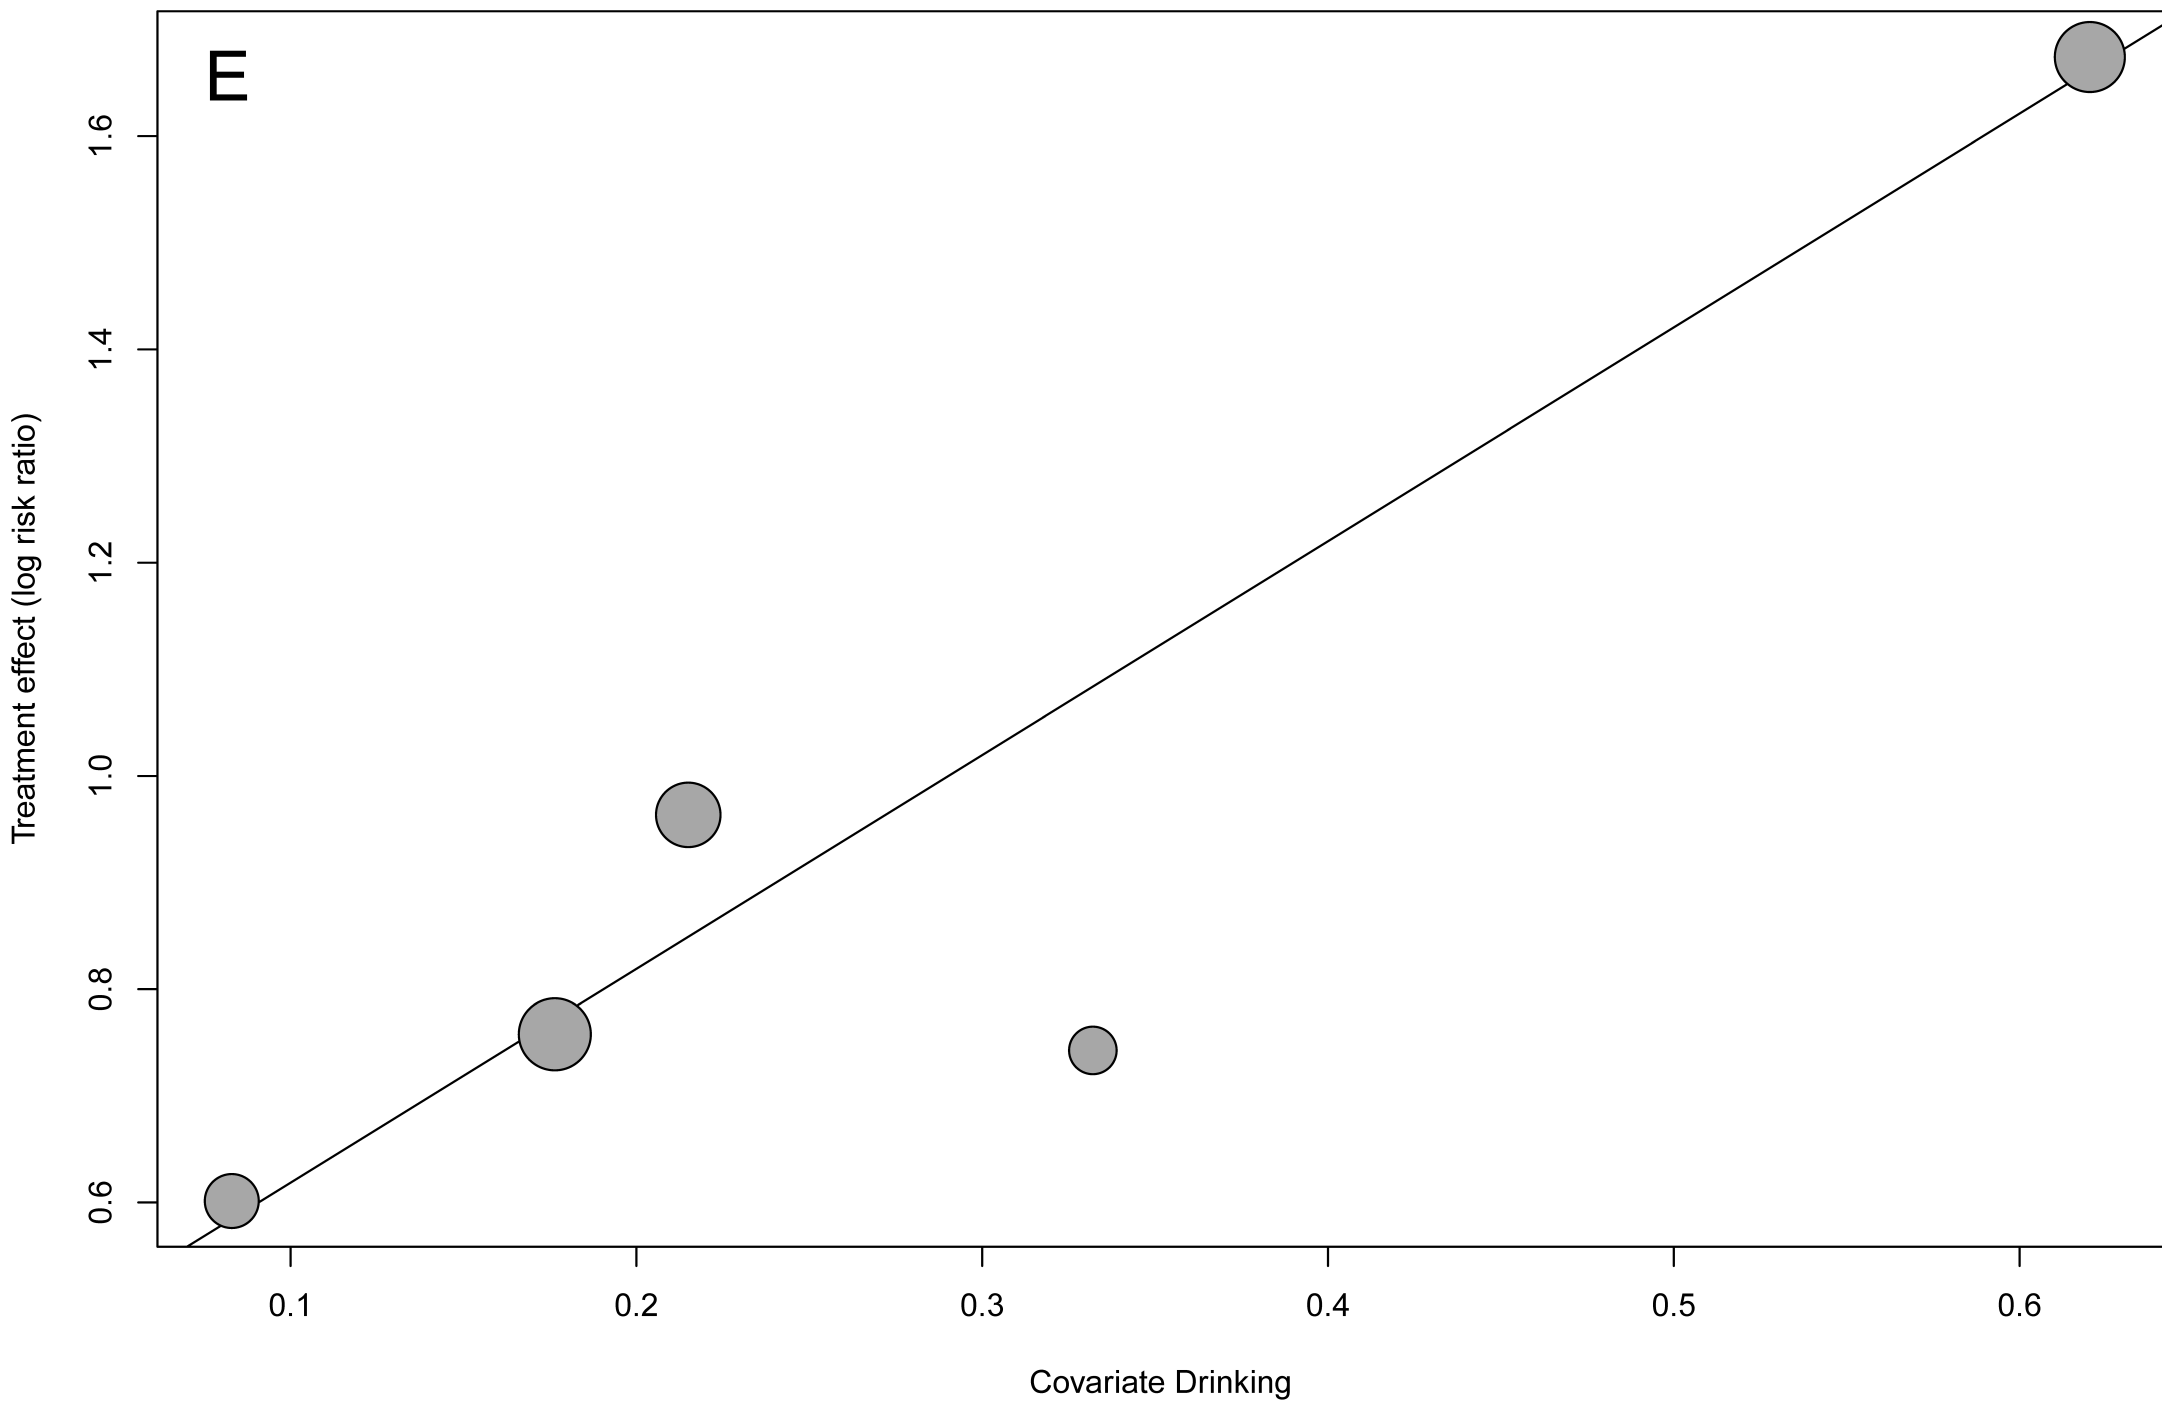

Supplement: f1 [file 8172639.f1.zip]

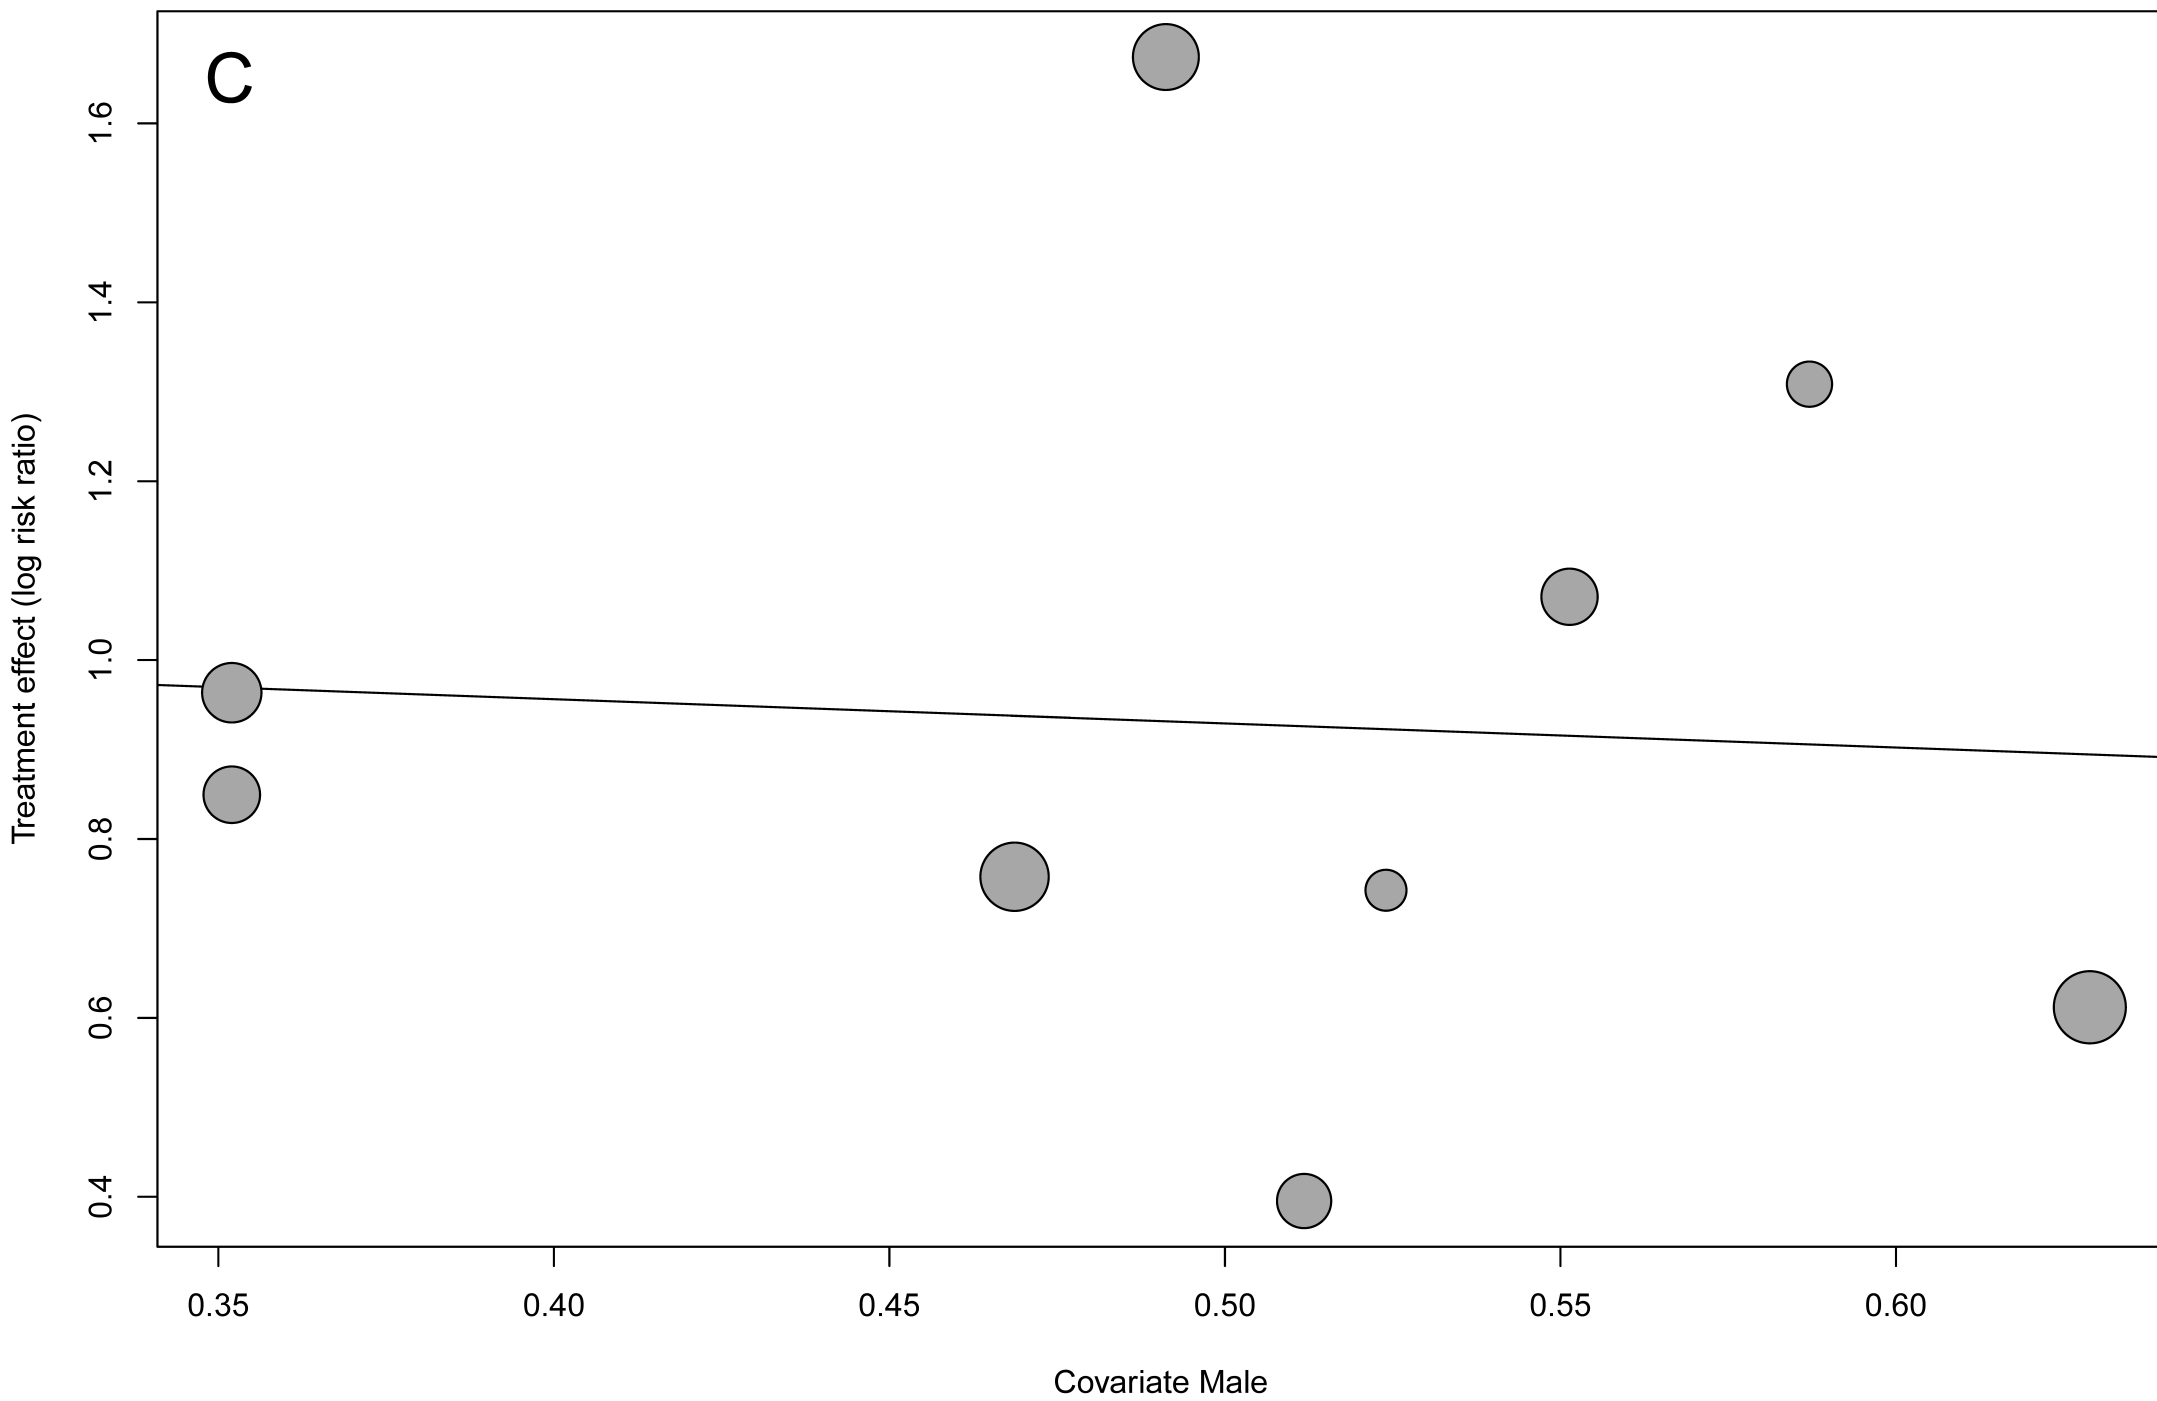

Supplement: f1 [file 8172639.f1.zip]

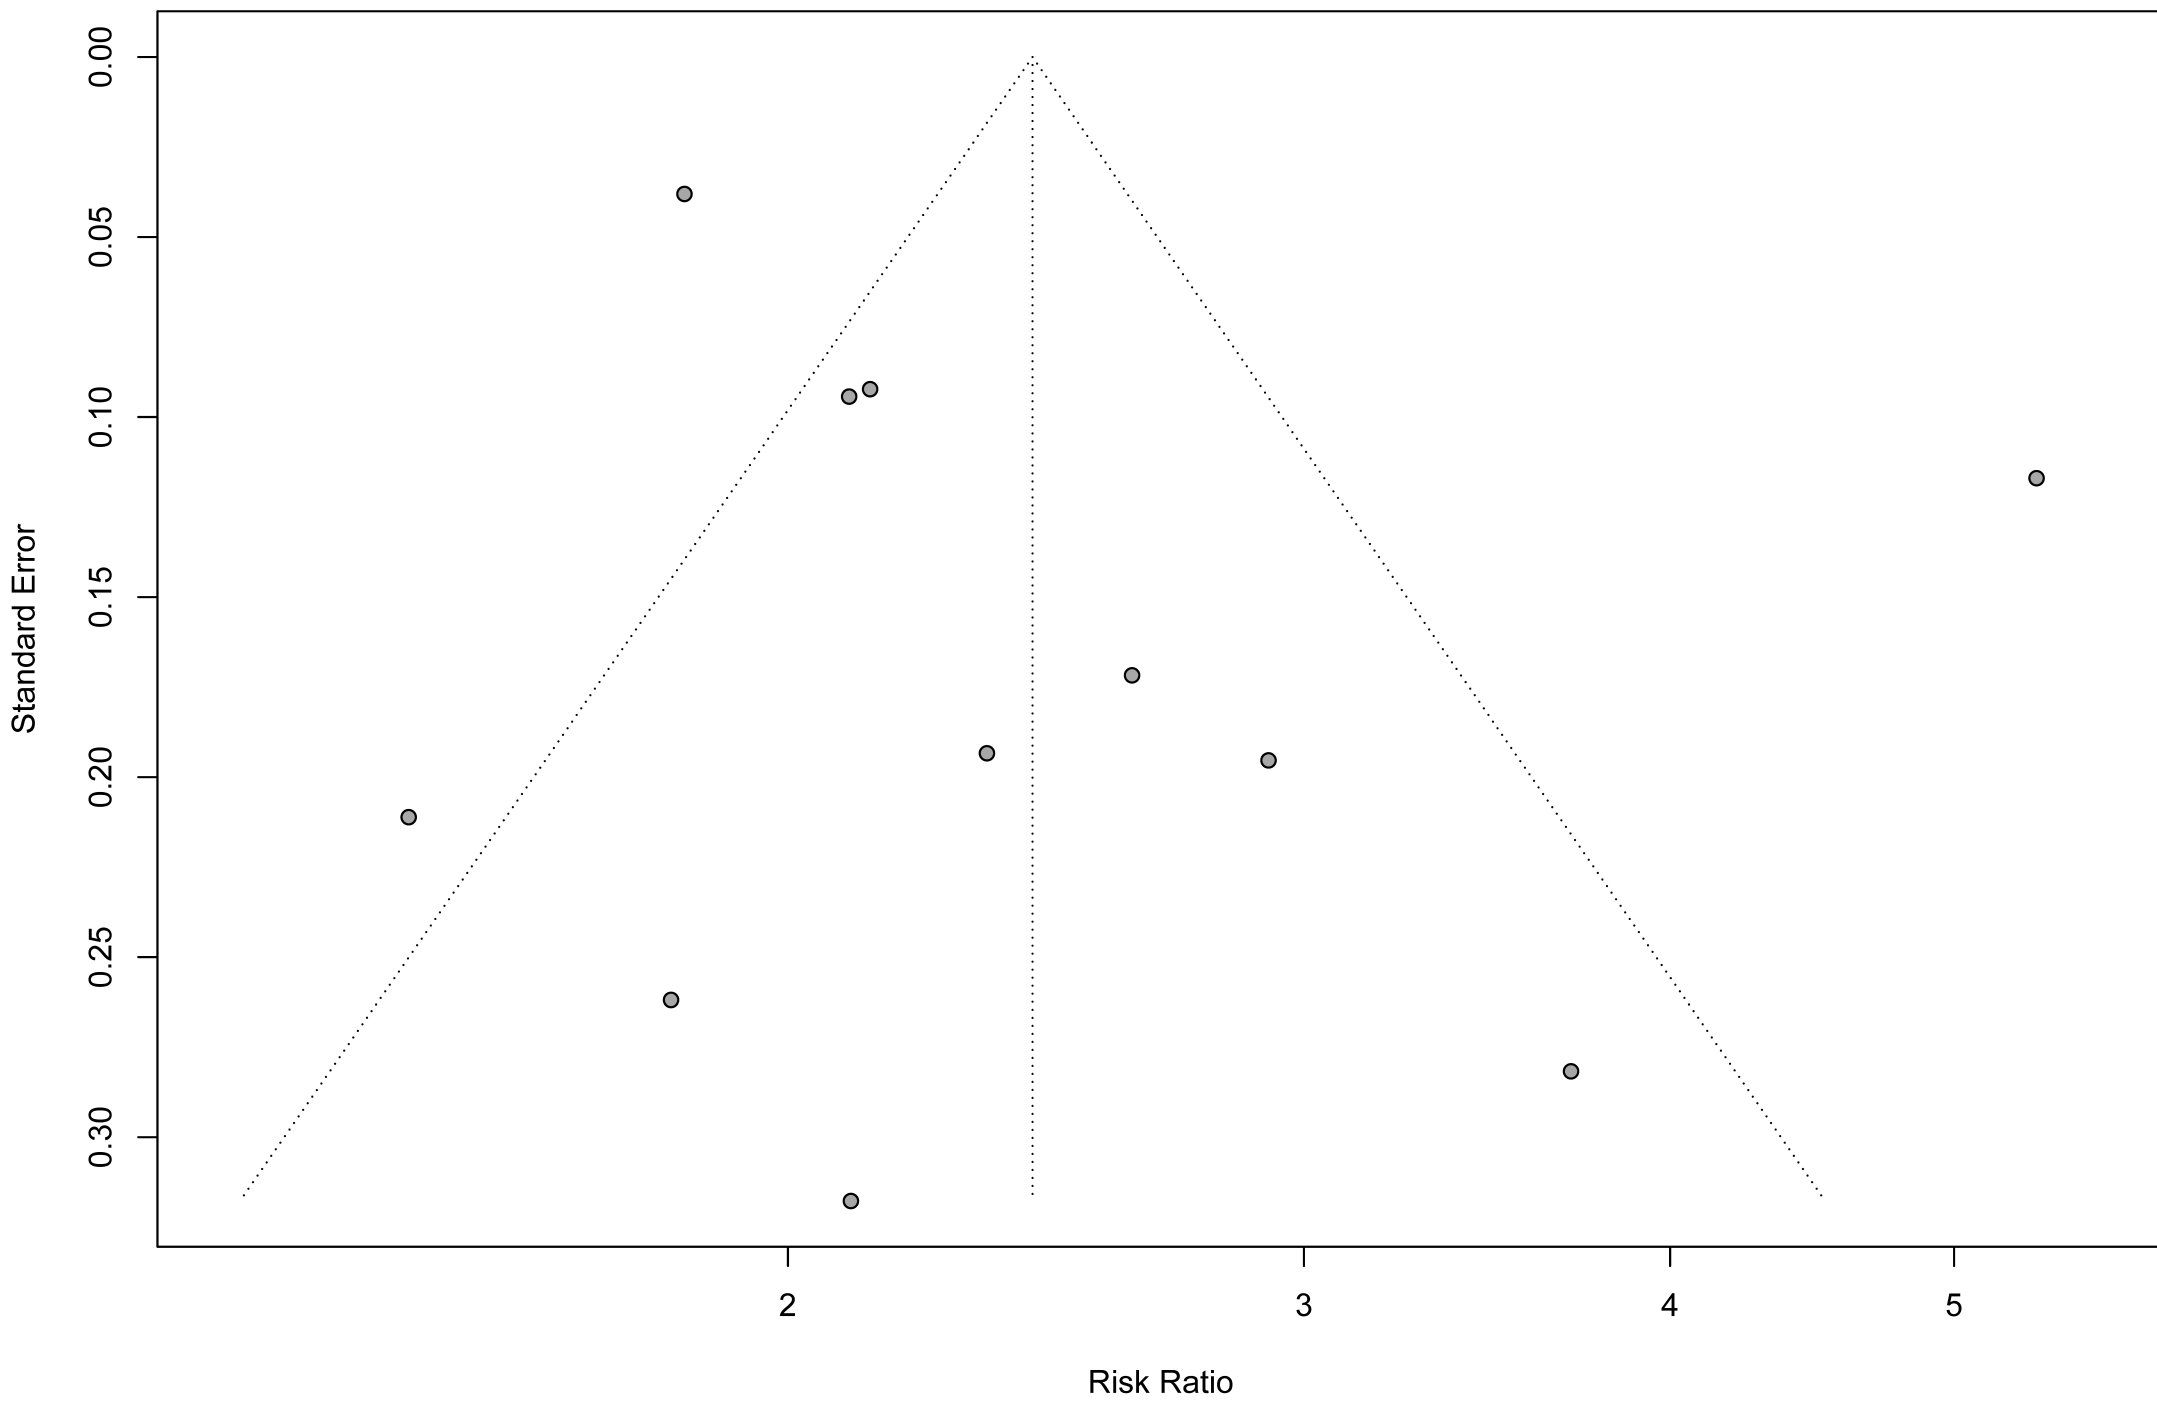

Supplement: f1 [file 8172639.f1.zip]

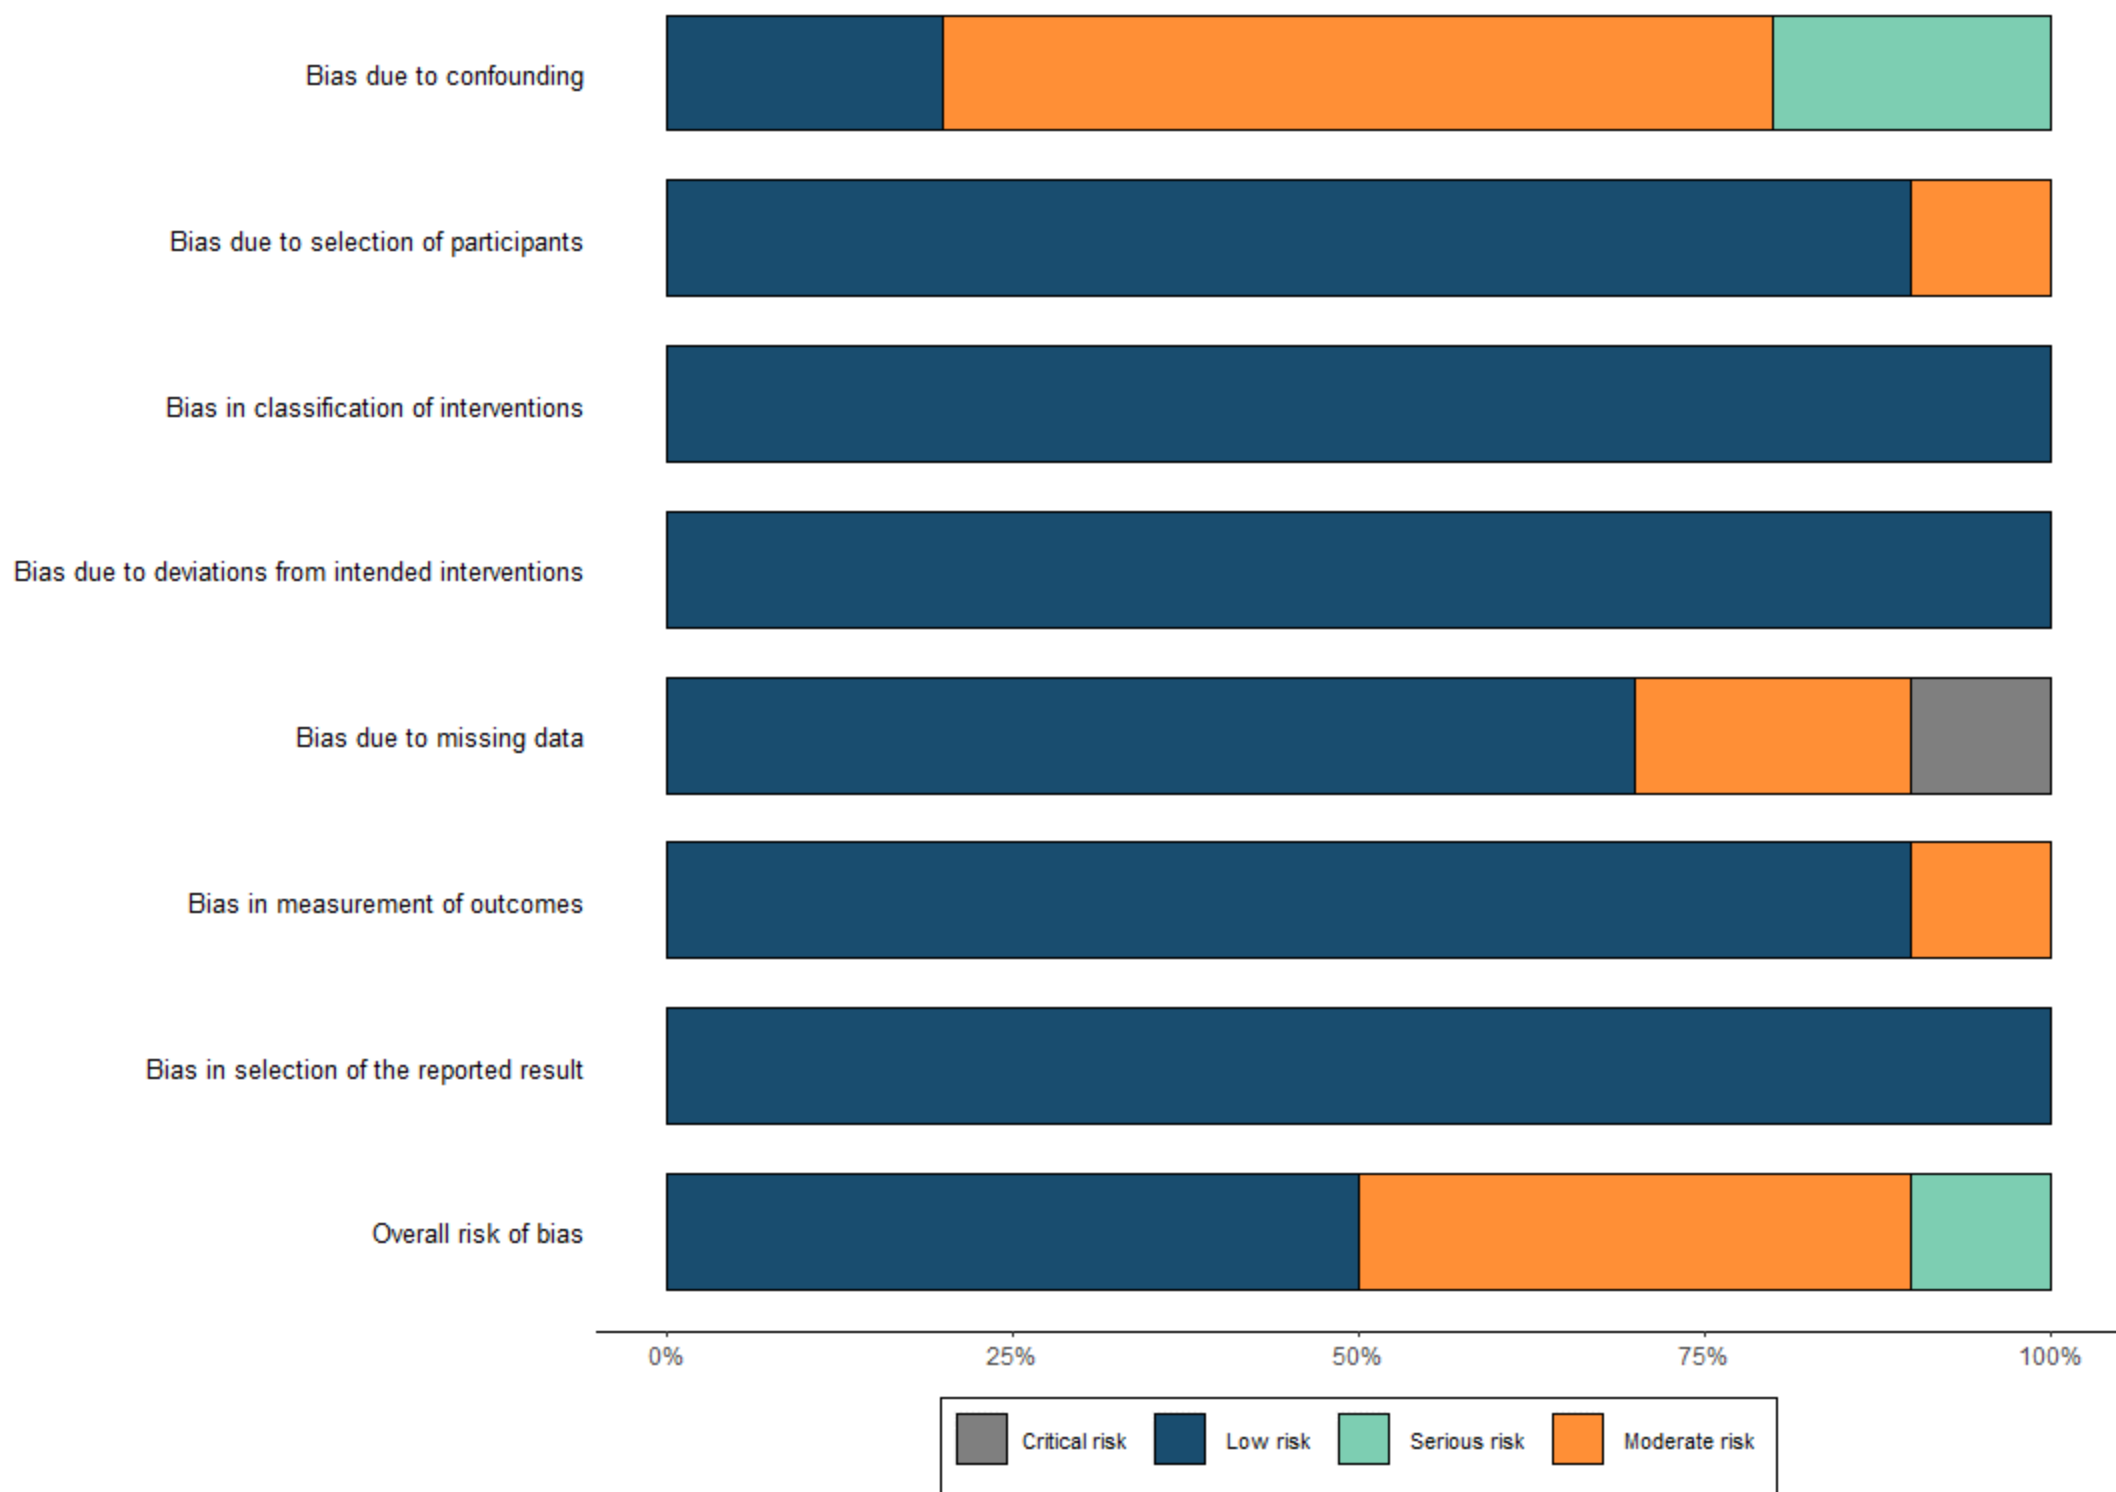

Supplement: f1 [file 8172639.f1.zip]

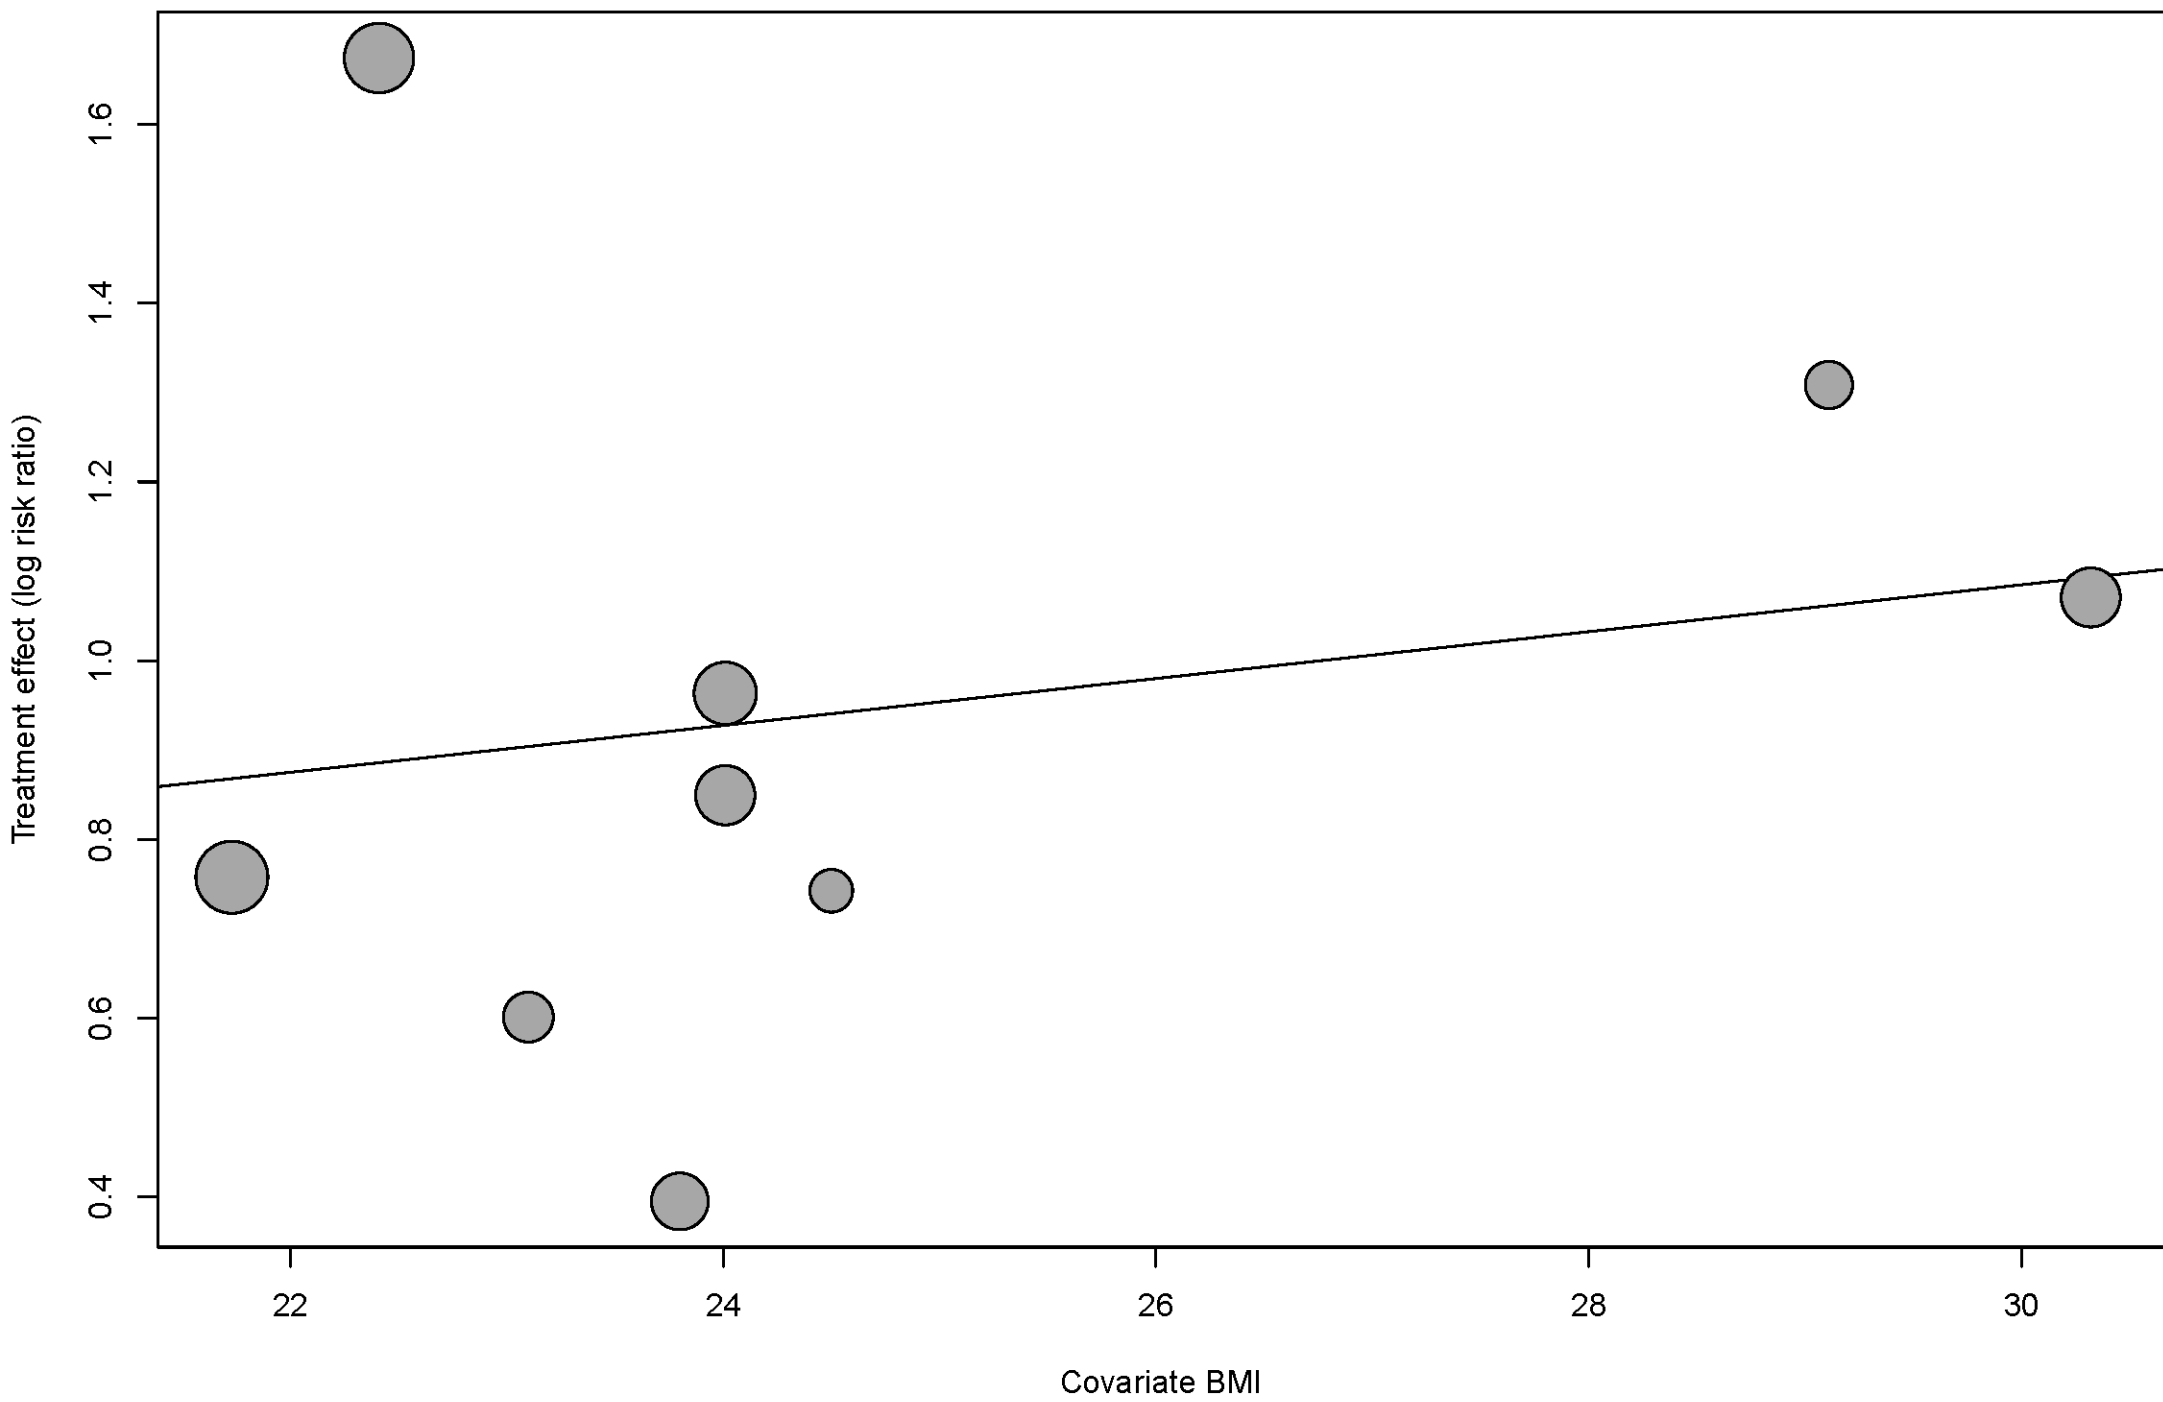

Supplement: f1 [file 8172639.f1.zip]
